# Supplementary material for: Development and validation of an early prediction model for hypertriglyceridaemic severe acute pancreatitis: a retrospective study
Source: PeerJ. 2026 Jan 20;14:e20607. doi: 10.7717/peerj.20607 (PMC12829462; doi:10.7717/peerj.20607)
Supplement: Supplemental Information 2 — The complete raw data of all enrolled patients in the model validation cohort, including both demographic characteristics and clinical parameters. [file peerj-14-20607-s002.xlsx]

## Sheet: Sheet1
Data for validation
No	Group	Age	RR	D_D	BUN	Ca	PH	PN	PE	PS
1	0	37	22	0.56	3.5	2.35	7.45	0	0	0
2	0	42	20	0.48	5.6	2.2	7.43	0	0	0
3	1	41	28	3.12	10.1	0.8	7.33	0	1	1
4	0	53	20	0.89	5.4	2.27	7.4	0	0	0
5	0	25	19	1.02	3.7	2.19	7.37	0	1	1
6	0	46	20	1.56	4.4	2.26	7.38	0	0	1
7	1	42	21	1.24	7.1	2.14	7.44	0	0	1
8	0	42	20	2.74	2.9	1.98	7.33	1	1	0
9	1	48	19	3.19	6.8	1.8	7.4	0	1	0
10	1	55	20	1.56	8	0.77	7.35	0	1	1
11	1	59	21	11.97	4.3	2.02	7.47	0	0	1
12	0	60	21	0.49	5.7	2.17	7.43	0	0	0
13	0	45	20	0.73	4.4	2.31	7.44	0	0	0
14	1	40	21	3.68	9.1	2.44	7.32	0	1	0
15	1	51	21	2.54	4.5	2.04	7.4	1	0	1
16	0	26	21	1.12	2.6	2.41	7.35	1	1	0
17	0	44	20	1.08	4.1	2.29	7.36	0	1	1
18	0	53	20	0.57	4.9	2.07	7.42	0	0	1
19	1	70	21	0.57	6.7	2.48	7.36	0	1	1
20	1	33	24	4.93	15.2	1.65	7.31	1	1	0
21	0	51	21	1.95	3.8	2.15	7.49	0	1	1
22	0	49	21	0.69	4.8	2.12	7.38	0	0	0
23	0	36	20	1.14	3.5	2.18	7.44	1	1	0
24	1	41	24	3.2	11.8	0.6	7.25	0	1	1
25	0	53	24	2.88	3.4	2.33	7.35	0	1	0
26	0	37	22	0.68	1.8	2.43	7.41	0	0	0
27	0	43	20	0.81	6	2.15	7.4	0	0	1
28	0	40	20	0.74	3.1	1.98	7.46	0	0	0
29	1	39	28	4.19	3.9	1.9	7.25	0	1	1
30	0	31	20	0.63	4.2	2.37	7.5	0	1	1
31	1	31	20	0.24	9.2	2.26	7.38	0	1	1
32	0	38	20	1.21	5.5	1.96	7.36	0	1	0
33	0	40	20	1.11	3.4	2.26	7.39	0	0	0
34	0	66	20	0.48	5.6	2.26	7.35	0	1	1
35	0	43	20	0.59	2.8	4.7	7.35	0	0	1
36	0	85	20	0.87	19.9	2.13	7.46	0	0	0
37	1	35	20	2.16	4	2.09	7.34	1	0	1
38	1	26	21	0.84	1.4	2.18	7.31	0	1	1
39	1	29	20	1.09	2.9	2.19	7.36	1	1	0
40	0	24	20	0.13	3.7	2.46	7.43	0	0	1
41	0	43	22	0.76	4.2	2.36	7.36	0	1	0
42	0	54	19	0.69	7.1	2.31	7.45	0	0	0
43	0	43	20	0.12	4.2	2.26	7.43	0	0	1
44	0	39	19	1.09	5	2.24	7.34	0	1	0
45	0	50	20	0.34	3.7	2.24	7.38	0	0	1
46	0	35	19	1.21	4.6	2.15	7.41	0	0	1
47	0	70	20	1.09	5.4	2.31	7.4	0	1	0
48	0	39	20	0.43	4.6	2.22	7.34	0	0	1
49	0	34	19	0.58	3.7	2.2	7.43	0	0	0
50	0	41	19	1.09	7.8	1.91	7.39	0	0	1
51	0	41	20	0.87	7.5	2.11	7.37	0	1	0
