# Supplementary material for: Development and validation of an early prediction model for hypertriglyceridaemic severe acute pancreatitis: a retrospective study
Source: PeerJ. 2026 Jan 20;14:e20607. doi: 10.7717/peerj.20607 (PMC12829462; doi:10.7717/peerj.20607)
Supplement: Supplemental Information 3 [file peerj-14-20607-s003.xlsx]

## Sheet: Sheet1
Data for Training
No	Group	Age	Sex	T2DM	HTN	CAD	T	HR	RR	MBP	MA	SIRS	CRP	WBC	N	NR	M	L	PLT	HCT	APTT	PT	INR	FIB	D_D	LPS	AMY	PCT	ALB	TB	BUN	Cr	Ca	GLU	LAC	TC	TG	LDL	PH	PaCO2	PaO2	PaO2_FiO2	PN	PE	AE	MCT_H	MCT_S	MCT_P	PS
1	0	52	1	0	0	0	36.4	60	20	102	0	0	8.5	5.57	3.62	0.64991	0.04	1.84	162	39.1	30.4	11.9	0.89	4.05	0.75	1498.7	362	0.02	43.6	12.8	4.2	62	2.16	21.74	2.1	7.44	29.92	12.9	7.42	29	120	571.429	0	0	0	48.0667	51.4	45.5522	0
2	1	28	1	1	0	0	37.9	99	51	110.667	0	1	75.21	15.95	13.97	0.875862	0.53	1.39	180	39.7	37	14.2	1.12	6.37	1.01	262.2	104	0.63	30.9	27.1	3.79	57.1	1.77	16.7	2.71	5.78	9.48	0.41	7.43	25	92	224.39	1	0	0	34.1649	39.27	27.3581	1
3	0	41	1	0	0	0	36.7	62	20	89.6667	0	1	2.91	12.35	9.81	0.794332	0.75	1.53	178	43.3	39.8	12	0.87	3.1	0.63	6000	727	0.01	41.5	8.2	3.4	66	2.15	6.21	1.87	14.86	22.98	3.65	7.49	28	128	387.879	0	0	0	51.09	55.64	43.3167	0
4	0	52	1	0	0	0	36.5	62	20	72.3333	0	0	12.37	18.79	15.43	0.821181	0.28	2.97	238	46.8	31.9	12.6	0.93	3.64	0.99	769.3	280	0.04	47.4	8.7	4.9	46	2.37	7.3	3.25	7	29.75	0.63	7.4	34	142	676.19	0	0	0	31.0009	46.27	37.016	0
5	0	39	1	0	0	0	36.7	98	19	100.333	0	0	0.5	15.23	12.09	0.793828	0.61	2.29	605	43.5	39.1	12.2	0.9	3.16	0.4	808	108	0.07	48.6	2.5	4.46	52.4	2.44	5.23	2.86	6.21	12.44	3.38	7.41	34	108	327.273	0	0	0	63.04	56.3067	47.9444	0
6	0	39	1	0	0	0	36.3	64	20	115	0	0	11.27	9.98	7.07	0.708417	0.64	2.11	171	49.6	29.6	11.3	0.86	2.17	0.48	167.8	74	0.01	44.5	6.1	3.3	77	2.27	9.2	1.31	5.02	10.58	0.99	7.41	30	127	384.848	0	0	0	35.5234	53.02	51.6061	0
7	0	37	1	0	0	0	36.3	95	20	108	0	1	129.79	13.75	12.2	0.887273	0.48	0.88	259	47	32.8	12.1	0.89	2.85	0.38	1435.3	585	0.01	46.2	9.6	4.03	50.1	2.35	12.6	2.6	6.44	20.39	2.55	7.42	30	121	576.19	0	0	0	40.26	51.3333	42.5456	0
8	1	36	1	1	0	0	37.1	151	49	110.333	0	1	370.29	7.89	6.36	0.806084	0.51	0.99	197	45.7	45.2	14.3	1.09	9.96	5.61	215	163	0.07	33.8	18.7	5.97	45.4	0.67	13.9	1.4	9.58	13.31	1.82	7.4	25	86	209.756	1	1	1	34.3	52.12	35.8833	1
9	1	39	1	1	0	0	37	91	41	89.6667	0	1	350.52	16.98	15.82	0.931684	0.5	0.58	145	43.5	47	15.9	1.25	10.25	2.21	389.4	352	97.35	34	40.3	12.36	248.8	1.75	21.4	3.59	9.21	14.56	1.48	7.27	29	66	160.976	1	1	0	34.64	47.2633	34.0322	0
10	1	30	0	0	0	0	36.9	145	39	76.6667	0	1	181.6	19.79	17.75	0.896918	0.85	1.15	365	48.3	38.5	14.1	1.11	6.06	2.13	1368	700	12.38	36.8	24	2.3	59	1.5	28.9	6.19	17.6	61.6	4.02	7.3	18	82	200	0	1	1	27.5886	51.09	34.2303	1
11	0	34	1	0	0	0	37	102	20	101.667	0	0	1.13	11.36	9.85	0.867077	0.36	1.11	194	46.2	36.7	11.8	0.9	2.55	0.53	77.1	66	0.01	43.5	5.4	5.55	57.8	2.34	10.7	2.2	8.23	17.72	3.3	7.24	43	179	617.241	0	0	0	52.92	56.29	44.3667	0
12	1	36	0	0	0	0	37.2	105	39	94.6667	0	1	200.86	22.08	19.68	0.891304	0.75	1.5	402	43	40.6	15	1.21	13.01	2.46	171.4	41	1.96	34.6	5	3	38	2.25	21.3	1.43	15.71	24.1	1.75	7.2	28	145	290	0	1	0	27.0167	39.6767	33.4933	0
13	1	52	1	1	0	0	36.4	78	38	121	0	1	100.86	17.11	14.44	0.843951	0.78	1.88	330	50	32.1	12.9	0.96	4.9	4.15	709.8	589	1.31	61.6	11	10.4	158	0.81	19.5	3.4	12.21	61	3.34	7.36	25	118	236	1	0	0	48.8138	49.81	30.8822	1
14	1	35	1	0	0	0	38.3	150	37	50.6667	1	1	112.5	16.76	12.69	0.75716	1.42	1.63	189	61.3	54.7	16.7	1.35	4.66	2.28	2024	2900	0.67	21.8	10.3	10.6	37.1	1.46	17.1	5.3	6.36	17.7	1.15	7.17	23	58	145	0	1	1	59.58	59.97	36.7933	1
15	0	40	1	0	0	0	36.5	98	22	110.667	0	1	2.02	16.49	14.11	0.85567	0.89	1.15	299	43.7	37.9	12.7	0.95	2.53	0.97	1847.1	678	0.09	46.2	15.5	6.7	55	2.31	7.7	1.91	6.53	23.15	1.69	7.37	39	125	431.034	0	0	0	61.33	53.0133	45.7889	0
16	1	54	1	0	0	0	36.2	142	35	71	1	1	100.9	2.06	1.66	0.805825	0.08	0.3	103	44.3	36.1	13.9	1.07	3.66	0.84	569	235	13.89	30.4	52	7.4	194	1.4	20.74	6.87	9.3	22.13	6.62	7.31	17.3	89.8	219.024	1	1	1	45.2508	53.87	33.9381	1
17	1	29	1	0	0	0	37.8	154	34	122.667	0	1	120.12	28.84	25.89	0.897712	2.68	0.22	287	48.7	43.8	12.4	0.92	5.55	2.91	1480.8	966	2.54	45.8	10.5	4.33	44.9	2.3	25.5	3.08	23.34	83.3	3.36	7.24	28	103	251.22	1	1	1	22.18	54.34	40.5578	0
18	0	25	1	0	0	0	36.5	105	18	92.6667	0	1	140.9	23.64	21.28	0.900169	1.21	1.09	397	52.6	32.8	13.5	1.04	6.41	1.02	319.1	422	2.589	41.7	33.3	3.88	38.5	2.48	20.1	3.34	14.13	36.81	2.77	7.3	30	130	448.276	0	1	0	44.6544	53.16	37.0348	1
19	0	52	1	0	1	0	36.7	88	20	109.667	0	0	38.9	14.26	11.98	0.840112	0.56	1.58	174	49	33.5	12	0.91	3.91	1.5	139.5	254	0.04	49.5	4	5	65.7	3.03	6.5	2.05	7.49	16.49	1.5	7.4	39	109	519.048	0	0	0	65.47	62.37	60.9147	0
20	0	36	0	0	0	0	37.1	114	32	87.6667	0	1	56.53	8.92	8.13	0.911435	0.47	0.3	183	38.3	32.8	12.8	0.98	3.38	0.98	174.4	108	0.15	40.4	21.5	3.7	33	1.68	8.63	5.299	3.21	40.71	1.25	7.36	37	77	233.333	0	1	1	56.64	52.1967	42.2567	0
21	0	45	1	0	0	0	36.3	67	20	98.3333	0	0	21.38	11.64	10.02	0.860825	0.38	1.18	153	45.2	31.8	12.3	0.91	3.84	0.56	489.4	283	0.01	45.6	5.9	6.97	63.3	2.5	12.2	3.48	7.58	17.07	1.03	7.4	32	138	657.143	0	0	0	46.2579	53.17	42.1815	0
22	0	34	1	0	0	0	36.5	134	23	94.6667	0	1	32.78	17.68	14.36	0.812217	1.11	1.91	252	45.7	34.2	12.2	0.92	3.84	0.84	246.4	143	0.41	45.1	13.3	3.75	52.2	2.38	8.9	2.46	8.32	20.21	1.19	7.34	30	98	466.667	0	0	0	36.7696	54.88	38.2331	1
23	1	32	1	0	0	0	37.3	121	30	108.333	0	1	75.27	11.47	9.83	0.857018	0.58	1.03	160	45	36.5	14	1.06	6.56	0.37	91.4	64	3.28	38.6	30.6	4.2	56.4	2	10.26	3.09	6.09	8.07	1.17	7.3	28	86	260.606	0	1	1	45.1738	55.09	37.4612	1
24	0	23	1	0	0	0	36.3	102	20	117.333	0	0	15.9	8.99	6.94	0.771969	0	1.97	180	43.9	39.6	12.4	0.93	3.72	0.63	1052.7	334	0.05	43.2	8.3	2.7	55	2.18	6.2	2.5	7.66	15.81	0.98	7.45	37	116	313.514	0	0	0	56.7933	42.9067	50.0978	0
25	0	34	1	0	0	0	36.7	103	20	105.333	0	0	1.4	10.54	7.46	0.70778	0.39	2.5	148	48.4	32	15.5	0.91	2.36	0.26	227.2	147	0.01	46.8	7.7	3.1	80.2	2.3	8.9	2.7	4.94	6.14	1.38	7.36	32	85	404.762	0	0	0	54.83	52.23	44.2214	0
26	0	43	1	0	0	0	36.3	68	20	116	0	1	5.6	12.67	10.74	0.847672	0.66	1.19	199	43.1	32.4	12.3	0.92	3.11	0.52	407.8	600	0.056	47.5	9.7	4.09	65	1.91	9.9	2.04	8.35	16.69	1.5	7.38	29	134	638.095	0	0	0	52.79	55.26	44.9448	0
27	0	39	1	0	0	0	36.8	81	19	95.6667	0	0	1.6	16.54	15.53	0.938936	0.35	0.65	184	46.1	22.7	14.6	1.48	3.28	0.37	886.4	575	0.04	50.1	8.6	6.3	63	2.33	6.2	2.33	5.13	12.1	1.2	7.45	32	120	363.636	0	0	0	60	59.73	41.4128	1
28	1	38	0	0	0	0	36.2	96	26	93	0	1	273.28	11.82	10.98	0.928934	0.43	0.39	182	38.4	35.5	14	1.06	3.78	3.34	519.4	422	2.1	32.6	8.3	4.69	37.4	1.18	6.8	7.97	15.95	19.7	3.92	7.33	19	96	234.146	0	1	0	49.011	57.66	39.2088	1
29	0	45	1	0	0	0	37.7	119	26	119.667	0	1	211.8	15.07	13.77	0.913736	0.5	0.75	215	45.3	39.2	13.4	1.05	6.19	0.94	413	194.6	1.414	36.8	23.5	2.62	70.6	3.03	7	3.75	6.13	9.55	1.19	7.36	37	77	187.805	0	1	1	38.5152	56.64	37.1936	1
30	0	51	1	0	0	0	36.3	70	19	108.333	0	0	17.38	14.8	11.75	0.793919	2	2.86	251	47.4	37.9	11.4	0.83	2.17	0.83	377	32.3	0.1	53.2	8.7	3.98	57.4	2.16	7.8	1.42	12.18	33.76	3.02	7.46	35	123	372.727	0	0	0	59.5633	49.5233	44.6367	0
31	0	41	1	0	0	0	36.9	70	20	124.333	0	1	20.01	12.72	10.3	0.809748	0.81	1.34	196	39.5	32.6	12.4	0.91	3.76	0.53	216.3	996.3	0.01	44.1	17.4	3.7	52	2.26	7.2	1.74	6.29	10.78	2.51	7.54	23	94	324.138	0	0	0	42.36	55.34	47.2289	0
32	0	47	1	0	1	0	36.4	107	20	121.333	0	0	18.4	11.73	9.4	0.801364	0.7	1.52	191	44.9	34.8	13.5	1.04	2.45	0.21	122	107	0.01	41.9	18	3.9	67	2.18	10.1	1.36	5.58	8.15	1.43	7.45	33	106	504.762	0	0	0	53.68	52.01	41.4346	0
33	0	37	1	0	0	0	36.5	71	19	89	0	0	155.46	11.45	9.99	0.872489	0.49	0.95	178	48.2	31.8	12.6	0.93	3.48	0.55	933.7	611	0.1	38.5	16.1	4.46	47.8	2.21	10.5	3.49	7.05	12.16	2.98	7.42	28	125	595.238	0	0	0	65.8008	57.72	50.7936	0
34	0	30	1	0	0	0	36.5	71	20	97	0	0	3.51	10.05	6.14	0.610945	0	3.73	173	46.4	29.3	17.4	0.91	2.87	0.45	218.3	122	0.34	40.5	21.8	2.1	65	2.09	7.9	3.57	6.29	18.36	1.12	7.36	41	123	307.5	0	0	0	47.5567	51.8967	49.5233	0
35	0	51	0	1	0	0	36.8	104	19	82	0	0	0.76	4.84	3.21	0.663223	0.03	1.5	152	41.1	30.7	11.9	0.91	4.09	0.53	35.5	155	0.12	48.1	8.2	5.8	44	2.32	11.5	1.37	8.39	25.65	1.09	7.43	35	136	647.619	0	0	0	40.8362	55.94	51.2783	0
36	1	19	0	1	0	0	36.9	101	21	104.333	0	1	25.51	9.08	7.38	0.812775	0.85	0.74	215	38.4	31.6	12.4	0.63	3.4	4.58	174	80	0.06	60	19	40.9	40.9	3.49	22.3	1.49	16.1	87.69	4.19	7.51	35	127	309.756	0	0	0	42.8184	59.47	41.2325	1
37	1	37	1	1	1	0	38.6	135	25	108.333	0	1	299.17	7.12	5.79	0.813202	0.46	0.82	155	40.2	44.7	15.7	1.3	8.76	1.72	291.7	217	7.95	37.7	20.3	6.1	145	1.74	17.4	1.84	6.82	13.21	1.13	7.39	30	90	219.512	1	0	0	48.69	48.73	32.8115	1
38	0	29	1	1	0	0	37	110	23	88.3333	0	1	7.5	12.95	10.41	0.803861	0.09	2.34	311	38.5	33.3	13	0.97	2.41	3.53	1792.5	746	0.05	43.3	31.9	2.5	24	2.19	15.9	4.7	15.93	99.7	4.76	7.42	30	149	513.793	1	0	0	50.23	43.1367	39.5561	0
39	0	36	1	0	0	0	36.9	101	20	105	0	0	0.5	15.95	14.84	0.930408	0.31	0.79	231	45	30.9	12.5	0.92	2.51	0.51	1074	751	0.06	49	7.4	4	61	2.21	7.9	2.82	6.7	14.42	1.88	7.42	35	128	609.524	0	0	0	52.0333	51.9433	48.1567	0
40	1	32	1	0	0	0	37.5	97	24	102.667	0	1	169.71	14.4	11.95	0.829861	0.63	1.18	268	55.2	34.9	11.7	0.88	4.01	0.46	6000	476	2.05	49.2	10.5	4.05	49.8	2.22	16.35	4.72	34.46	11.85	3.17	7.34	35	93	320.69	1	1	0	54.93	51.23	35.4089	1
41	1	29	0	1	0	0	36.5	99	25	79.6667	0	1	112.75	13.27	11.72	0.883195	0.25	1.27	158	39.8	30.4	13	1.02	4.5	1.02	303.3	144	0.55	34.6	12.6	1.46	39	1.91	23.6	2.28	3.82	5.7	0.85	7.35	32	117	285.366	0	1	1	46.5073	58.87	39.6391	1
42	0	31	0	0	0	0	37.2	74	19	98	0	0	56.38	13.55	9	0.664207	0.03	4.49	308	40.5	38.3	11.8	0.89	3.6	0.49	822.8	511	0.01	50.4	4.7	6.87	47.5	2.36	11.7	4.95	7.66	31.02	1.84	7.38	38	112	533.333	0	0	0	40.9233	49.52	47.3022	0
43	0	47	1	0	0	0	36.5	103	20	110.333	0	0	20.4	7.02	3.8	0.541311	0	3.07	149	46.8	36.6	12.2	0.92	2.3	1.09	394.3	123	0.01	52.8	12	5	46.1	2.6	6.8	2.8	5.37	21.55	0.4	7.41	34	147	700	0	0	0	25.0991	58.37	46.3069	0
44	0	52	1	1	0	0	36.6	74	20	83	0	0	187	10.48	9.14	0.872137	1.3	0.28	138	43.3	39.1	12.7	0.96	2.74	0.86	99.7	82	0.11	45.8	2.8	5.97	37.1	2.74	13.6	2.05	11.9	35.4	1.85	7.45	34	171	814.286	0	0	0	48.3574	53.14	37.7294	0
45	0	52	0	0	0	0	37	82	20	111	0	0	8.7	10.49	9.44	0.899905	0.38	0.65	169	41.2	37.4	12.4	0.93	3.66	0.73	1343.3	746	0.085	46.2	13	4.62	35.2	2.43	6.91	1.79	9.39	15.23	1.84	7.46	35	105	362.069	0	0	0	50.89	50.67	34.9623	1
46	0	29	1	0	0	0	36.7	74	20	95.3333	0	0	10.95	11.89	9.75	0.820017	0.43	1.59	374	42.5	30.1	12.1	0.91	3.03	0.49	478	372	0.04	37.9	1.4	4.33	64	2.7	7.16	1.85	7.37	12.9	3.82	7.41	40	90	310.345	0	0	0	53.3826	56.79	53.1933	0
47	0	35	1	1	1	0	36.5	135	25	112.667	0	1	366.87	9.46	8.58	0.906977	0.29	0.59	182	48.7	41.3	14.9	1.15	8.51	4.79	873.1	692	7.97	29.8	16.9	11.39	112.3	2.25	17.98	2.01	5.78	6.32	1.3	7.36	23	90	219.512	0	1	0	54.4558	56.14	36.1167	1
48	0	31	1	0	0	0	36.7	74	21	93.3333	0	1	31.56	13.51	10.94	0.809771	0.03	2.36	265	44.4	36.4	12	0.88	3.17	3.06	391	85	0.06	49.6	7.8	4.5	25	2.48	15.5	1.54	15.4	64.05	4.92	7.4	40	97	334.483	0	0	0	54.88	50.3533	52.99	0
49	0	32	1	0	0	0	36.4	75	19	105.333	0	0	43.4	20.17	17.85	0.884978	1.01	1.27	300	50	32	12.3	0.91	4.04	3.2	1300.1	749	0.104	57.7	11.6	2.2	23	2.54	19.5	4.45	15.7	25.3	3.38	7.42	33	73	347.619	0	0	0	49.7636	52.94	49.2342	0
50	0	36	0	1	1	0	36.5	105	20	93.3333	0	0	98.41	12.76	11.32	0.887147	0.66	0.75	329	38.6	33.2	12.8	0.96	2.47	0.47	151.5	210	0.01	46	9.6	2.2	32	2.17	14.4	3.1	16.33	36.89	1.09	7.4	35	135	642.857	0	0	0	29.7833	50.53	47.08	0
51	1	45	0	0	0	0	36.8	92	24	103.667	0	1	169.22	8.63	7.69	0.891078	0.38	0.55	164	30	44.1	16.8	1.4	7.54	3.35	768.7	543	0.06	28.1	94.8	2.1	66	1	14.7	1.5	12.19	30.34	0.81	7.47	28	159	265	0	1	1	36.2033	45.5367	35.2489	0
52	0	41	1	0	0	0	36.4	75	20	117.667	0	1	25.38	14.47	12.83	0.886662	0.67	0.96	218	44.6	34.2	12.8	0.97	3.23	0.85	468.1	274	0.04	41.6	4.9	5.12	46.5	1.98	13.02	1.76	10.44	29.16	5.2	7.4	31	173	524.242	0	0	0	46.2562	56.41	40.4272	0
53	0	52	0	0	0	0	36.5	107	21	103.333	0	1	4.16	14.13	12.68	0.897381	0.53	0.93	174	37.8	35.3	12.4	0.94	3.57	0.57	776.8	316	0.05	35.3	6.4	4.5	42	1.9	7.3	1.5	5.54	26.09	0.27	7.35	28	112	339.394	0	0	0	33.9967	49.27	42.4956	0
54	0	25	1	1	0	0	36.9	113	24	110.333	0	1	190.13	15.3	13.45	0.879085	0.57	1.27	214	43.7	36.1	13.4	1.06	7.9	0.88	753.2	230	1.46	36	14.7	4.6	68	2.11	34.2	3.27	20.22	45.62	0.73	7.24	25	159	265	0	1	0	57.9926	54.71	35.7439	1
55	1	29	1	0	0	0	37	101	21	92.6667	0	1	47.5	14.2	12.58	0.885915	0.99	0.6	123	55.6	35.3	13.6	1.02	3.59	0.59	2238.6	828	0.2	45.1	209	3.97	4.87	2.43	13.2	2.23	8.08	24.06	0.71	7.31	44	140	341.463	0	1	0	45.5628	52.98	36.5562	1
56	1	45	1	0	0	0	36.8	133	24	102	0	1	153.4	25.57	22.86	0.894016	1.34	1.25	239	48.1	40.1	12.5	0.93	6.57	3.84	3258	1128	3.78	56.9	39	3.99	33.2	1.42	22.5	5.63	22.95	82.45	8.83	7.38	22	85	141.667	1	1	1	51.85	36.91	23.7133	1
57	1	54	1	0	0	0	35.8	102	23	96.3333	0	1	115.21	8.08	5.53	0.684406	0.59	1.95	127	47.7	45.8	17.4	1.4	4.28	1.39	1428	763	0.99	18.9	22.6	10.1	256	1.3	13.7	4.59	8.85	18.5	1.5	7.21	29	51	154.545	1	0	0	60.88	59.12	40.7928	1
58	0	45	1	0	0	0	36.5	112	21	115.667	0	1	11.64	17.57	16.18	0.920888	0.68	0.68	201	44	16.8	13.3	1.05	4.16	0.63	174	149	0.13	47	10.8	6.8	56	2.25	6.98	2.19	7.23	17.1	1.36	7.28	29	97	461.905	0	0	0	44.3054	53.38	36.8322	1
59	0	49	1	0	0	0	36.6	110	21	102.333	0	1	34.38	22.09	19.77	0.894975	0.07	2.19	329	42.1	30.9	16.4	0.87	2.9	0.59	697.7	366	0.04	44.9	8.3	4.1	45	2.42	8.9	2.4	9.49	23.06	1.08	7.4	44	105	500	0	0	0	58.94	56.33	59.3343	0
60	1	48	0	1	0	0	37.3	128	23	97	0	1	26.92	12.66	10.6	0.837283	1.35	0.69	175	37.6	27.8	12.8	1	2.65	2.14	1115.6	389	0.68	34.1	3.2	2.4	72.3	2.09	22.5	4.5	17.14	79.44	0.22	7.33	29	107	260.976	0	1	0	43.5024	57.24	39.114	1
61	0	36	0	0	0	0	36.8	77	20	91.6667	0	0	156.57	12.48	10.93	0.875801	0.23	1.3	133	45.4	36	12.4	0.96	3.39	1.12	102.7	82	0.01	41.4	4.1	3.7	67.8	2.15	5.4	1.6	8.5	44.87	0.36	7.43	35	107	324.242	0	0	0	56.3719	54.73	47.7975	0
62	0	50	1	0	0	0	36.5	77	20	101.667	0	1	5.89	16.9	15.46	0.914793	0.69	0.73	202	41	34.5	13.1	0.98	4.19	0.71	747.1	605	0.01	40	17.4	6.14	61.4	2.03	7.2	3.65	6.09	9.6	2.01	7.33	29	139	421.212	0	0	0	56.98	54.6233	40.2711	0
63	1	29	1	1	0	0	37.5	174	23	99	0	1	324.84	6.24	4.56	0.730769	0.48	1.19	235	48.4	40.1	14.5	1.18	11.08	1.6	250.7	267	21.37	39.2	40.5	5.1	69	1	16.9	1.8	5.86	6.56	3.35	7.3	29	89	240.541	1	1	1	56.4201	56.99	38.7532	1
64	1	48	1	0	0	1	37	102	23	69	0	1	232.15	15.98	13.63	0.852941	0.93	1.23	276	41.3	32.1	16.7	1.36	8.49	8.54	2826.1	1563	40.66	31.4	147.6	12.1	306	0.92	11.6	9.4	8.05	28.74	0.51	7.34	21	110	220	1	0	0	47.16	57.6867	38.3444	1
65	0	25	0	1	0	0	36.5	98	18	89.3333	0	0	41.09	13.85	11.85	0.855596	0.28	1.46	293	42.6	35.7	13	0.97	4.88	1.06	315.4	8935.4	0.16	45.5	18.2	3.1	9	2.3	16.2	2.22	6.23	33	0.78	7.36	32	115	547.619	0	0	0	60.8334	57.39	56.6248	0
66	0	52	1	1	0	0	36.8	78	19	83.6667	0	0	274.73	8.48	6.47	0.762972	0.47	1.44	177	37.8	31.5	12.5	0.95	5.17	0.43	78	53	0.21	44.6	22.9	4.13	56	2.29	13.7	2.75	5.54	7.71	2.35	7.35	35	154	531.034	0	0	0	53.87	55.81	53.7633	0
67	0	36	0	0	0	0	36.8	105	20	94.6667	0	1	10.55	16.92	15.52	0.917258	0.48	0.9	164	36.8	32.8	12.8	1	3.58	1	1538.3	565	0.06	37.9	8.9	2.8	75.2	1.84	11	1.9	11.54	42.46	0.58	7.42	30	161	392.683	0	0	0	36.8805	53.45	36.7023	1
68	0	37	1	0	1	0	36.5	78	20	125	0	0	29.77	10.3	7.21	0.7	0.66	2.07	186	50.1	28.4	11.3	1.15	2.37	1.05	57.4	78	0.05	43.3	10.3	3.7	60	2.23	6.4	1.78	7.39	7.16	3.11	7.39	28	128	609.524	0	0	0	56.7267	52.8967	43.6	0
69	0	46	1	0	0	0	36.5	78	20	108.667	0	0	9.7	15.58	14.16	0.908858	0.72	0.69	262	51.6	30.8	11.8	0.88	2.17	0.48	1046.9	237	0.104	40.6	20.9	5.46	39.5	2.28	7.9	4.24	2.99	6.26	0.54	7.48	32	137	472.414	0	0	0	51.6342	54.93	57.3103	0
70	0	45	1	0	0	0	36.5	97	20	94	0	0	12.9	17.55	14.88	0.847863	1.65	0.97	216	50.6	33.1	11	0.82	3.47	3.3	1185.3	593	0.087	62	3	3.5	65	3.45	8.7	3.41	21	67	3.85	7.36	37	75	357.143	0	0	0	38.0549	52.13	52.13	0
71	1	30	1	1	0	0	37.8	136	23	107.333	0	1	337.27	11.88	9.86	0.829966	0.7	1.3	194	52.5	39.4	14.4	1.12	10	2.98	251.1	197	16.07	37.3	14.9	7.1	110	2.23	21.16	4.34	11.13	17.82	2.08	7.25	15	113	226	1	0	0	58.87	53.28	42.7789	0
72	0	32	1	0	0	0	36.7	78	20	92.6667	0	0	17.89	15.48	12.82	0.828165	0.39	3.21	382	40.3	42.9	12.9	0.96	4.49	0.3	405	178	0.04	47.2	4.9	5.99	63.7	2.71	7.3	1.63	13.07	28.53	6.7	7.35	35	122	580.952	0	0	0	54.6189	58.73	60.8834	0
73	1	50	0	1	0	0	38	126	23	83.3333	0	1	109.3	17.5	16.2	0.925714	0.58	0.7	279	41.1	30.2	13	1.02	4.47	0.68	1320.2	635	1.65	37.4	37.1	2.12	43.3	1.82	21.8	4.1	10.18	28.04	1.44	7.3	37	122	297.561	0	1	1	40.5594	54.81	38.9151	0
74	1	40	1	0	1	0	36.8	91	23	120	0	1	223.4	8.3	6.88	0.828916	0.44	0.96	197	35.6	35.5	13.7	1.03	10.33	5.9	365.5	149	5.74	33.8	16.2	8.6	100	1.4	10	1.8	6.59	8.69	1.26	7.42	27	142	284	0	1	1	27.8433	57.5	36.5922	1
75	0	58	0	0	0	0	36.3	105	22	102	0	1	20.8	9.89	8.13	0.822042	0.53	1.06	220	40.9	40	12.2	0.9	4.17	0.29	194.7	168	0.01	43.3	27.6	4.77	45	2.23	8.08	3.06	7.24	15.3	2.65	7.4	37	76	262.069	0	1	0	36.29	51.59	36.0978	1
76	0	43	0	0	0	0	36.6	79	20	69.6667	0	0	39.77	19.96	18.16	0.90982	0.82	0.96	221	38.9	39.5	13.2	0.99	3.17	0.81	116.9	106	0.01	35.8	10.7	3.52	37.9	2	12.1	2.1	10.96	20	3.77	7.34	39	160	457.143	0	0	0	53.67	50.16	40.59	0
77	0	47	1	0	0	0	37	79	20	107.667	0	1	68.38	5.03	3.11	0.61829	0.18	1.52	182	34.2	56.1	15.6	1.24	5.82	1.01	897.4	698.2	0.169	44.3	22	32.6	75.3	2.32	13.14	2.15	3.74	6.15	2.36	7.42	28	152	723.81	0	0	0	44.8293	50.37	41.1355	0
78	0	54	1	0	0	0	37	79	21	130	0	0	14.83	9.51	7.03	0.739222	0.57	1.03	194	44.4	26.5	13.5	1.38	3.79	0.96	193.8	90	0.02	38.3	7.7	3.4	44	1.98	6.6	1.98	8.06	22.19	1.12	7.34	36	128	387.879	0	0	0	51.8933	58.82	48.0378	0
79	1	37	1	1	0	0	37	141	21	71.6667	0	1	345.1	9.48	8.69	0.916667	0.35	0.8	218	50.4	36.6	12.6	0.97	5.51	2.45	2615	2797	8.7	35.5	8.2	8.5	111	0.98	40	2.4	12.4	28.18	1.76	7.25	12	131	319.512	0	1	1	52.89	51.43	35.3153	1
80	0	36	1	0	1	0	36.6	79	21	116.667	0	1	14.3	9.64	6.61	0.685685	0.71	2.18	249	43.3	36.2	12.5	0.95	1.98	0.41	53.7	30	0.06	45.4	11.4	3.5	82	2.31	6.7	2.26	7.25	18.76	0.81	7.4	32	128	387.879	1	0	0	46.37	52.11	37.5192	0
81	1	36	1	1	0	0	37.3	95	22	103	0	1	103.88	14.12	12.3	0.871105	0.57	1.23	244	54.8	180	18.6	1.53	3.27	1.74	274.1	1030	24.66	38.3	21.3	9.53	102	0.77	21.1	2.4	7.97	18.47	1.78	7.36	35	105	210	1	1	0	48.79	44.7767	34.7011	0
82	0	42	1	0	0	0	36.8	81	22	129	0	1	7.46	19.28	16.87	0.875	0.02	2.36	263	40.8	33.1	12.5	0.92	4.4	0.56	368	759	0.38	46.7	3.2	5.04	49.3	2.37	10.42	3.71	13.93	36.48	2.8	7.4	41	94	229.268	0	0	0	34.3967	50.4267	42.4611	0
83	1	37	1	0	0	0	36.8	106	22	142.333	0	1	352.9	9.31	5.66	0.607948	0.04	3.44	273	46.6	34.6	12.7	0.96	2.15	0.75	1096	171	0.01	44.7	9.1	4.5	56	2.33	8.6	3.76	7.57	22.99	0.72	7.34	25	71	173.171	0	1	0	56.68	54.13	36.9888	1
84	0	61	1	0	0	0	37.1	80	20	123.333	0	0	9.19	4.47	2.06	0.46085	0.38	1.9	161	43.1	30.1	12.6	0.97	2.08	0.48	598.6	247	0.005	41.9	12.4	3.95	61.5	2.17	6.19	2.69	5.65	7.72	1.99	7.39	42	71	338.095	0	0	0	58.67	56.24	47.6165	0
85	0	65	0	0	0	0	36.7	80	21	127.333	0	0	3.4	8.11	6	0.739827	0.37	1.61	79	35.1	35.1	13	1	3.72	0.8	2784.4	945	0.16	46.7	21.5	8.4	88	2.29	12	1.82	6.44	13.19	1.62	7.49	30	120	413.793	0	0	0	42.17	52.11	37.6929	0
86	0	43	1	0	0	0	36.8	119	21	128.667	0	1	165.45	28.35	26.22	0.924868	0.84	1.25	255	42.4	40.5	13.1	1.01	6.91	0.5	712.9	303	0.31	42.6	12.8	2.8	59	2.22	10.1	2.7	6.59	11.96	1.16	7.45	31	154	466.667	0	0	0	47.77	57.7533	39.6333	1
87	0	31	0	0	0	0	37	110	23	105.667	0	1	21.26	17.25	15.29	0.886377	0.41	1.21	375	40.5	40.4	12.3	0.91	2.97	0.63	553.5	320	0.14	16	5.5	2.87	26.4	2.65	12.55	2.83	8.74	27.22	3.03	7.47	32	93	320.69	0	1	1	49.87	44.33	30.3489	1
88	0	41	1	0	0	0	36.8	102	18	116.333	0	0	90.16	9.39	6.22	0.662407	0.4	2.64	219	41.9	36.9	12	0.89	2.42	0.32	192.5	96	0.05	40.6	22.9	4.6	81	2.29	7.61	2.13	9.69	41.45	0.83	7.42	26	98	466.667	0	0	0	32.4567	58.4967	53.24	0
89	0	37	0	1	0	0	36.7	81	18	98	0	1	18.25	20.44	16.84	0.823875	0.07	3.35	279	43.9	34.9	12.6	0.96	3.69	0.57	173.3	116	0.01	43.3	6.8	2.88	20.6	2.37	16.9	2.53	14.58	36.4	2.56	7.38	30	119	566.667	0	0	0	48.5167	52.3733	46.2178	0
90	0	39	1	0	0	0	36.8	81	19	93	0	0	14.29	26.62	24.24	0.910594	1.14	1.21	357	51.1	32.8	12.4	0.91	5.95	1.16	3899	1236	0.35	36.8	14.8	3.7	71.4	2.12	23.8	3.3	12.55	42.68	0.67	7.42	32	125	595.238	0	0	0	59.1374	55.79	54.1163	0
91	1	40	0	1	0	0	38.3	102	22	69.3333	0	1	45.78	20.89	17.69	0.846817	0.98	2.19	426	46.8	48.1	18.3	1.48	6.34	3.51	326.3	159	0.15	30.8	19.3	6	133	1.61	23.7	6.49	14.44	35.88	1.78	7.38	15	72	218.182	1	0	0	47.2828	54.98	37.2031	1
92	1	28	1	0	0	0	37.1	159	22	114	0	1	119.84	5.02	3.67	0.731076	0.36	0.93	228	54.3	38.8	14.7	1.15	3.92	4.99	789.3	152	2.17	35.4	13.3	5.1	123	1.56	11.8	3.81	4.44	8.6	1.23	7.421	26.5	115	383.333	1	0	0	31.84	51.4767	35.1867	1
93	0	40	1	0	0	0	36.5	95	20	115	0	1	1.3	14	6.96	0.497143	0.13	0.64	210	46.9	29.8	12.7	0.95	2.77	0.83	1895	551	0.04	48.4	13.7	3.6	51	2.82	9.1	4.1	7.82	35.45	1.04	7.45	36	86	409.524	1	1	1	56.09	52.07	35.5812	1
94	0	36	0	1	1	0	36.8	108	22	101	0	1	55.22	10	7.6	0.76	0.48	1.63	223	40.7	35.6	12.8	0.95	3.84	1.35	86	102.6	0.11	44.4	11.5	3.02	32	2.3	16.6	1.6	4.81	10.59	2.13	7.45	33	90	272.727	0	0	0	41.2967	50.7333	43.39	0
95	0	41	1	0	0	0	37.9	92	22	86	0	1	44.27	6.9	6.28	0.910145	0.17	0.45	198	48.2	37.1	12.8	0.97	4.19	0.86	1085.8	619	0.3	40.1	18.8	3.4	64	1.86	7.9	2.23	10.57	21.32	1.92	7.44	30	85	257.576	0	0	0	40.69	51.06	34.04	1
96	0	32	1	0	0	0	36.5	97	20	114	0	1	7.6	15.1	13.9	0.92053	0.65	0.6	156	45.8	32.5	12.9	0.99	3.54	0.4	749.7	419	0.04	45.4	11.4	6.31	69.4	2.23	12.2	2.89	5.59	13.35	0.97	7.39	43	161	487.879	0	0	0	44.1873	50.79	52.1444	0
97	1	27	1	0	0	0	37.3	91	22	108.333	0	1	452.3	9.68	8.56	0.884298	0.044	0.67	333	59.2	41.4	15.7	1.25	8.95	1.44	688	510	26.638	37.5	9	8.62	85.9	1.59	16.9	3.05	10.15	25.4	8.15	7.3	33	81	202.5	1	1	1	58.7203	57.01	37.6266	1
98	0	55	0	0	0	0	36.3	83	19	104.667	0	0	1.74	6.24	4.04	0.647436	0.35	1.78	168	39.6	33.5	12.5	0.93	3.09	0.44	199.8	129	0.12	44.4	8.6	4.1	52	2.21	23.3	1.56	11.81	24.92	1.17	7.34	30	121	576.19	0	0	0	50.4633	55.22	46.6533	0
99	1	22	0	1	0	0	36.6	103	21	104.333	0	1	13.05	17.39	14.71	0.845888	2.34	0.2	279	41.4	33.4	12.4	0.91	3.19	2.86	81.4	60	0.23	66.8	1	4.22	18.6	2.51	13	3.51	17.25	79.28	4.97	7.34	37	160	390.244	0	1	1	57.4172	62.41	42.6468	1
100	0	56	1	0	1	0	36.6	96	20	110	0	0	7.52	10.75	8.98	0.835349	0.41	1.34	216	41.3	30.5	12.5	0.93	2.79	0.3	160.4	143	0.07	44.4	10.6	6.09	68.3	2.33	5.2	1.44	7.01	8.51	2.93	7.45	33	129	614.286	0	0	0	52.69	48.7433	52.8478	0
101	1	28	1	0	0	0	36.8	98	20	98.6667	0	1	7.9	13.56	11.7	0.862832	0.52	1.29	195	49.5	26.9	12.3	0.94	3.33	0.46	405.3	162	0.056	44.3	7	3.48	49.7	2.44	11.6	3.15	12.19	37.08	1.84	7.35	42	135	329.268	0	0	0	40.9791	59.39	40.5832	1
102	0	39	1	0	0	0	36.8	83	20	95	0	0	10.24	10.49	8.96	0.854147	0.03	1.41	153	46.7	37.6	13.2	1	2.97	0.47	197.4	203	0.01	48.1	9	3.1	75	2.21	6.8	0.9	7.08	17.05	1.84	7.39	44	228	556.098	0	0	0	38.5641	55.89	53.2818	0
103	0	35	1	0	0	0	36.5	83	21	99	0	1	4.46	14.36	12.05	0.839136	0.72	1.85	255	43.8	33.5	12.7	0.94	3.4	0.38	255	150	0.01	42.1	15	2.67	47.7	2.14	7.5	3.36	4.89	5.98	2.46	7.34	34	97	461.905	0	0	0	53.07	53.02	42.38	0
104	0	49	1	0	0	0	36	98	21	104.333	0	1	0.92	14.89	13.68	0.918737	0	1.18	245	48.5	39	12	0.87	3.76	0.85	141.1	113	0.08	46.3	8.3	5.32	46.3	2.87	13.9	2.53	17.4	41.56	2.3	7.38	37	98	337.931	0	0	0	52.5767	50.73	43.3322	0
105	0	42	1	0	1	0	36.9	84	21	96.3333	0	1	11.72	15.02	13.64	0.908123	0.62	0.72	261	38.6	31.7	13.3	0.99	3.07	0.44	814.6	501	0.07	45.3	7.5	4.21	54.4	2.36	7.9	2.98	6.77	17.07	2.7	7.46	32	102	309.091	0	0	0	50.7467	48.5	40.2289	0
106	1	40	0	0	0	0	36.5	78	20	89.6667	0	1	125.61	20.85	18.29	0.877218	1.59	1.78	263	44.2	27.6	11.6	0.86	3.08	4.02	407.7	150	0.01	45.8	5	3	54	2.01	20.3	4.2	14.21	81.85	0.39	7.33	20	120	300	1	0	0	16.7967	39.5833	26.9722	1
107	0	30	1	0	0	0	36.3	85	18	88.6667	0	1	28.4	15.69	13.52	0.861695	0.67	1.43	232	46.9	36.7	12	0.9	3.88	0.57	450.3	286	0.04	48.7	8.7	4.11	62.2	2.52	7.2	4.09	7.95	18.14	1.28	7.43	31	79	376.19	0	0	0	59.11	56.46	43.6624	0
108	0	44	0	1	0	0	36.3	85	20	107	0	0	6.76	11.21	9.53	0.850134	0.41	1.21	166	42.1	30	12.3	0.93	2.81	0.71	729	127	0.12	45.7	10.9	3.4	36	2.12	14.1	1.9	10.53	31.84	0.63	7.39	37	104	315.152	0	0	0	51.83	55.98	44.2967	0
109	0	66	0	0	0	0	36.8	97	20	93.3333	0	0	4.2	10.31	7.31	0.70902	0.52	1.71	144	38.1	30.4	11.5	0.85	3.5	2.1	693.8	315	0.04	44	6.1	5	47	2.37	10.7	2.59	9.58	20.03	2.04	7.36	30	129	614.286	0	0	0	39.8629	51.77	47.9735	0
110	1	48	0	0	0	0	36.2	106	23	117.667	0	1	75.21	24.28	22	0.906096	1.17	0.87	297	43.6	36.3	16.3	1.07	10.95	6.98	218.1	114	1.29	35.7	10.5	3.69	38.7	2.02	15.72	3.75	7.89	6.61	4.91	6.99	9	143	433.333	0	1	0	52.16	55.11	41.43	0
111	0	41	1	0	0	0	36.4	98	20	104.333	0	1	48.4	12.78	11.31	0.884977	0.46	0.91	173	44.5	29.6	12.7	0.96	2.89	0.53	1077.8	631	0.09	47.6	10	4.2	59	2.2	7.8	2.38	6.83	12.39	1.74	7.41	31	98	466.667	1	0	0	42.8184	56.34	38.3112	1
112	0	43	0	0	0	0	36	85	21	95	0	0	0.5	10.85	8.27	0.762212	0	2.51	340	41.3	33.3	12	0.89	2.65	0.45	310.5	124	0.01	46.5	5.1	3.2	53	2.22	5	3	7.75	18.55	1.44	7.38	30	109	519.048	0	0	0	33.1133	48.19	41.0711	0
113	0	52	1	0	0	0	37.8	110	22	117.333	0	1	51.08	10.28	8.11	0.788911	0.03	2.04	140	47.6	31.9	13.2	1.04	3.04	0.56	1773	670	0.12	44.7	13.6	4.97	79.1	2.19	10	3.61	9.35	31.66	1.37	7.42	34	77	233.333	0	1	1	46.7016	53.68	35.4288	1
114	1	49	1	1	1	0	36.5	77	22	113.333	0	1	227.58	10.32	9.19	0.890504	0.29	0.74	150	46.7	39.4	14.9	1.2	10.07	2.9	893.2	112	2.46	33.3	23.6	7.9	80	1.23	21.81	3.3	20.57	40.35	1.26	7.4	32	105	210	1	1	1	38.7	51.3667	33.88	1
115	0	55	1	0	0	0	36.4	101	22	89.3333	0	1	65.4	18.62	16.18	0.868958	1.1	1.19	226	39	42.5	12.9	0.95	3.91	1.24	563.2	436	0.09	44	13.8	5	32	2.29	15.9	3.56	20.8	56.9	5.29	7.42	39	76	230.303	0	1	1	42.1939	53.41	35.0726	1
116	1	21	1	1	0	0	36.8	99	20	106	0	1	116.17	10.72	9.69	0.903918	0.49	0.53	133	43.9	23	15.5	0.95	3.28	0.5	1816.5	632	0.58	47.2	13.8	5.3	70	2.19	18.3	2.3	5.51	17.32	0.62	7.41	29	103	312.121	1	0	0	20.6033	52.6067	42.0944	0
117	0	50	1	0	0	0	37	97	20	99.6667	0	1	42.96	13.28	11.45	0.862199	0.52	1.3	178	50	42.3	13.8	1.07	5.53	0.57	623.8	534	0.09	49.2	2.6	4.75	44.5	2.69	15.5	1.07	9.37	25.03	1.58	7.46	32	77	366.667	0	0	0	37.5366	51.42	34.9656	1
118	0	33	1	0	1	0	36.7	85	21	144.333	0	1	1.07	16.18	13.63	0.842398	0.74	1.7	293	48.4	33.3	11.5	0.85	3.36	0.17	3039.2	1356	0.08	46.3	8.9	4.9	39	2.32	14.55	3.4	10.37	29.99	1.44	7.4	41	142	430.303	0	0	0	35.9667	54.97	47.4411	0
119	0	32	1	0	0	0	36.5	86	19	85	0	0	2.4	7.8	4.5	0.576923	0.58	1.02	234	38	31.5	16	1.14	3.57	0.27	159.4	865	0.23	44	18.3	8.5	75	2.1	10	2.34	6.35	13.24	2.5	7.42	33	135	642.857	0	0	0	63.6981	56.37	49.2298	0
120	0	57	1	0	0	0	36.5	101	20	116.667	0	0	53.27	10.61	8.75	0.824694	0.46	1.37	183	44.3	34.3	12.4	0.91	2.74	0.37	245.6	148	0.04	41.3	17.8	6.95	60	2.2	6	2.14	9.53	17.22	1.3	7.39	40	177	842.857	1	0	0	53.37	51.73	38.1078	0
121	0	48	1	0	0	0	36.7	87	19	115	0	0	0.5	17.39	14.84	0.853364	0.66	1.83	308	46.2	32.2	11.9	0.89	3.44	0.44	178.5	184	0.06	46.3	10.9	4.1	67	2.39	7.16	3.1	6.88	10.48	1.36	7.41	32	112	533.333	0	0	0	49.7467	50.1533	42.8833	0
122	0	47	1	0	0	0	36.5	87	19	113	0	0	11.71	16.5	13.98	0.847273	0.91	1.55	183	47.3	32.3	12.7	0.93	2.64	0.54	852.4	293	0.06	44	40.5	4.6	47	2.35	9.8	3.29	7.73	21.87	0.51	7.43	36	152	723.81	0	0	0	54.98	53.2767	44.6811	0
123	0	46	1	1	0	0	36.5	103	20	106	0	0	30.36	12.98	9.59	0.738829	1.05	2.2	201	44.5	40.8	12.4	0.91	2.96	1.73	181.2	82	0.12	45.6	14	1.9	28.7	2.02	8.9	2.32	20.25	54.81	4.99	7.41	32	135	409.091	0	0	0	48.3456	50.36	47.1705	0
124	1	51	1	1	0	0	38.4	75	22	74.6667	0	1	47.89	14.99	13.02	0.868579	0.37	1.48	170	46.6	46.4	13.6	1.08	3.22	4.68	1247.6	466	0.64	39.9	13	5.62	63.7	1.95	12.98	2.25	5.67	10.65	2.11	7.42	33	119	297.5	0	0	0	51.0514	54.31	35.6636	1
125	0	38	1	0	0	0	38.2	115	22	83.3333	0	1	53.78	16.66	14.59	0.87575	0.85	1.17	244	44.6	33	12.4	0.94	3.38	0.97	2364.3	1151	0.56	49.1	18.8	4	36	2.09	14.8	3.1	11.96	39.88	0.92	7.4	34	76	230.303	0	0	0	50.99	55.79	36.5478	1
126	0	30	1	0	0	0	38.2	102	22	110.667	0	1	12.37	9.62	7.84	0.814969	0.4	1.33	191	40.6	37.4	13.4	1.02	8.23	0.77	66	36	0.07	49.9	30.8	2.2	83	2.5	6.18	1.5	15.91	10.65	3.51	7.46	37	71	173.171	1	1	1	42.8976	59.58	38.9256	1
127	1	28	1	0	0	0	36.7	102	21	118.667	0	1	20.1	17.38	15.61	0.898159	1.01	0.73	298	51.2	32.1	12.2	0.91	3.27	1.21	527.4	368	0.21	55.4	12.3	5.05	54	2.71	9.2	6.85	10.79	45.38	2.36	7.28	36	125	357.143	0	1	1	59.36	48	35.0222	0
128	0	48	1	0	1	1	37.8	116	22	90.6667	0	1	82.43	9.9	8.67	0.875758	0.43	0.77	141	48	30.9	12.7	0.95	5.75	0.86	1712.3	1162	1.58	40.1	23.4	4.5	69	1.99	13	2.6	11.87	21.4	1.06	7.43	33	95	256.757	0	0	0	42.7067	48.6333	31.7056	1
129	0	30	1	0	0	0	38.2	102	22	116	0	1	307.5	9.62	7.84	0.814969	0.4	1.33	191	40.6	37.4	17.4	1.02	8.23	0.77	66	36	0.41	49.9	30.2	2.2	85	2.5	7.1	1.5	15.91	10.65	3.51	7.46	37	71	244.828	0	0	0	55.7522	56.89	36.9785	1
130	0	48	1	1	0	0	37.1	98	22	118	0	1	56.78	7.95	6.58	0.827673	1.29	0.02	130	42.7	25.8	12.3	0.93	2.55	1	333	113	0.15	47.2	19.3	4.7	27	2.4	15.1	3.26	18.5	38.68	4.9	7.4	45	91	313.793	0	0	0	65.3782	59.98	40.5865	1
131	0	25	0	1	0	0	37.8	87	21	120.667	0	1	47.58	7.17	4.96	0.691771	0.32	1.79	321	39.2	34.4	12.9	0.95	6.71	0.69	36.8	50	0.01	38.2	5.2	4	42	2.26	10.8	2.43	11.8	18.42	1.88	7.41	37	145	439.394	0	0	0	38.5433	44.37	35.7744	0
132	0	48	1	0	0	0	36.5	102	22	123	0	1	2.65	15.58	13.35	0.856868	0	2.18	301	47	32.7	12.2	0.94	2.83	2.08	493.9	164	0.06	42.8	10.3	4.6	67	2.21	21.17	3.2	15.89	81.1	0.27	7.41	40	78	236.364	1	1	1	34.0633	37.8967	26.7822	0
133	1	30	1	1	1	0	36.4	97	22	124.667	0	1	214.27	17.49	15.36	0.878216	0.77	1.31	229	52.2	36.1	12.3	0.92	4.91	0.95	1220.7	277	0.144	46	24	8	32	2.35	7.6	4.17	15	69.6	3.36	7.38	39	96	234.146	0	1	0	46.2072	59.24	38.506	1
134	0	54	1	0	0	0	36.5	104	20	96.6667	0	0	22.14	10.82	7.96	0.735675	0.74	1.9	176	41.5	37.4	12.5	0.95	4.35	0.34	32.3	24	0.1	47.3	16.3	4.1	85	2.35	5.6	2.45	8.05	17.99	1.29	7.34	38	135	642.857	0	0	0	42.8488	56.38	41.7212	0
135	0	35	0	0	0	0	36.7	88	20	105	0	0	342.3	10.94	9.89	0.904022	0.43	0.59	182	34	35.9	12.8	0.97	3.87	0.77	373.1	456	0.01	38.3	11.5	2.2	25	2	9.3	2.61	18.44	52.05	3.55	7.35	32	132	628.571	0	0	0	45.7692	53.22	51.8008	0
136	1	30	1	1	0	0	36.8	98	22	85.6667	0	1	29.88	26.08	23.5	0.901074	6.8	0.76	127	46.5	45.7	12.4	0.95	4.14	3.03	6810	2207	0.15	69.1	18	14.3	306	2.45	29.8	3.01	20.43	97.3	6.73	7.35	25	73	146	0	1	0	55.09	30.95	22.6322	0
137	1	26	1	1	0	0	36.5	151	22	94.6667	0	1	56.37	15.11	11.77	0.778954	1.12	2.21	264	51.1	38.8	15.4	1.24	7.14	2.5	927.6	386	26.12	34.3	58.6	12.8	168.1	1.86	31.8	3.04	5.26	7.86	0.8	7.369	30	106	212	1	1	1	38.24	50.25	32.16	1
138	0	55	0	0	0	0	36.8	110	19	93	0	1	65.27	14.28	12.88	0.901961	0.53	0.84	255	45.5	37.4	14.2	1.1	6.96	1.17	422.5	343	0.24	42.7	21.7	3.86	42.8	2.4	15.4	3.13	6.45	5.85	2.79	7.29	31	117	403.448	0	0	0	59.35	51.5133	34.64	1
139	0	43	1	0	0	0	36	102	21	101.667	0	1	84.96	13.62	12.02	0.882526	0.58	0.82	166	50.6	30	13.5	1.07	3.42	2.19	1186.8	688	2.64	39.5	13.6	7.5	108	1.61	14.3	6.3	8.8	17.57	0.87	7.45	28	104	315.152	1	1	1	53.98	53.19	35.6856	1
140	1	32	0	0	0	0	37.6	98	22	127.333	0	1	157.22	5.94	4.79	0.806397	0.2	0.87	209	35.4	36	13.8	1.05	8.34	3.83	109.1	64	0.77	34.1	21.6	2.15	44.7	1.97	11.55	0.88	8.19	9.6	3.52	7.53	21	80	275.862	0	1	1	69.45	52.1133	51.2089	0
141	0	23	1	0	0	0	37	108	22	92.6667	0	1	6	13.45	8.9	0.66171	0.83	3.48	208	47.8	35.8	12.3	0.93	4.34	0.56	1885	393	0.19	44.8	11.5	5	90	2.46	5.64	2.8	6.55	19.03	1.24	7.41	43	66	200	0	0	0	33.0467	55.9833	43.2367	0
142	1	32	0	1	1	0	37.6	98	22	127.333	0	1	157.22	15.92	7.94	0.498744	0.2	0.87	209	35.4	36	13.8	1.05	8.34	3.83	109.1	64	0.77	34.1	21.6	2.15	44.7	1.97	12.4	0.88	8.19	9.6	3.52	7.31	28	92	278.788	0	1	1	50.36	49.0467	31.1656	1
143	0	30	1	0	0	0	36.8	88	20	89.3333	0	0	10	19.38	17.77	0.916925	0.48	1.1	357	44.2	28.5	12.5	0.95	3.33	0.62	326	334	0.049	48.7	12	4.14	52.5	2.03	8.8	5.47	6.06	8.93	1.57	7.36	34	158	544.828	0	0	0	44.0154	56.43	54.1728	0
144	0	40	1	0	0	0	36.4	100	21	102	0	1	103.75	18.68	17.15	0.918094	0.5	1.03	270	47.2	31.6	12.2	0.91	2.71	0.48	1195.8	658	0.21	46.7	14.8	4.9	53	2.29	7.97	4.88	9.75	21.41	1.41	7.38	35	96	457.143	0	0	0	50.7367	58.4767	47.6478	0
145	0	40	1	0	0	0	36.4	88	21	102	0	1	2.04	18.68	17.15	0.918094	0.5	1.03	270	47.3	31.6	12.2	0.91	2.71	0.48	1195.8	658	0.21	46.7	14.8	4.9	53	2.29	7.97	4.88	9.74	21.41	1.41	7.38	35	96	331.034	0	0	0	57.72	53.34	40.7344	0
146	1	36	1	0	0	0	36.3	98	22	56	0	1	292.5	15.67	14.6	0.931717	0.31	0.74	237	44.6	35.1	11.6	0.85	6.26	3.37	1882	445.7	1.88	47.8	22	17.7	355	2.22	11.8	4.29	0.16	9.25	0.64	7.53	35	93	226.829	1	0	0	50.7472	55.16	34.3831	1
147	0	34	1	0	0	0	36.5	89	20	98	0	1	3.88	12.23	8.49	0.694195	0.73	2.53	193	45.1	35.5	12.2	0.9	2.57	1.39	108.6	88	0.01	45.2	7.9	7.3	69	2.3	7.2	2.61	5.39	14.04	0.96	7.32	30	99	471.429	1	0	0	58.6633	59.8633	46.2822	0
148	0	35	1	1	0	0	36.6	90	20	86.3333	0	0	60.2	5.43	3.01	0.554328	0.04	2.25	258	46.9	30.5	12.2	0.91	2.78	3.47	468.7	310	0.23	46.2	13.6	5.8	28	2.37	13.2	1.47	14.29	45.2	4.35	7.45	35	112	339.394	0	0	0	38.7411	53.07	46.8785	0
149	0	50	1	0	1	0	36.7	90	22	117	0	1	12.48	12.46	9.21	0.739165	0.45	2.74	180	43.9	28.3	11.9	0.88	1.7	0.45	703.5	279	0.01	41.5	6.4	8.18	69.8	2.35	7.9	3.98	4.58	13.41	2.03	7.41	36	76	361.905	0	0	0	57.34	49.82	46.6647	0
150	0	26	1	0	0	0	38.1	112	22	110	0	1	163.59	19.82	17.92	0.904137	0.89	1.01	225	51.5	38.6	12.3	0.91	6.35	0.64	281.3	174	0.16	45.7	15	3.18	4.19	2.33	17.5	2.61	11.89	28.01	3.5	7.38	31	111	277.5	1	0	1	38.37	49.57	35.7656	0
151	1	36	1	0	0	0	38.8	140	22	87.3333	0	1	115.33	13.23	11.65	0.880574	0.88	0.67	305	47.4	39.4	13.6	1.08	5.45	1.03	2924.1	1486	6.84	38.8	9.8	4.6	126.3	0.84	29.1	1.8	7.04	24.49	0.4	7.34	21	109	265.854	1	0	0	43.4043	49.89	30.2666	1
152	0	35	1	0	0	0	36.3	119	22	97.6667	0	1	124.75	11.04	9	0.815217	0.53	1.17	230	46.6	33.5	13.4	1.04	6.97	1.36	390.2	166	0.09	44.4	20.6	4.7	64	2.05	17.1	4.2	5.71	9.95	1.3	7.3	27	109	294.595	0	1	1	19.4333	58.2167	50.5811	0
153	0	40	0	1	1	0	36.5	102	20	108.667	0	1	22.94	16.45	14.49	0.880851	0.49	1.29	368	39.5	33.3	12.7	1.02	4.97	1.34	4830	1169	0.08	43.8	7	3	13	2.12	23.6	2.1	9.47	44.98	0.97	7.53	32	129	390.909	0	0	0	58.36	50.4733	43.6933	0
154	0	35	0	0	0	0	37.8	157	25	84.6667	0	1	217.58	16.94	15.3	0.903188	0.64	0.95	243	37.7	36.3	15.8	1.27	9.09	3.05	86.1	78	6.63	34.9	10.6	7.47	57.7	1.91	14.3	2.9	5.64	9.13	1.61	7.43	35	104	495.238	1	0	0	51.77	51.8433	34.5967	1
155	0	75	0	0	0	0	36.3	61	18	94.3333	0	0	8.69	8.9	7.81	0.877528	0.42	0.66	120	29.9	32.6	12.7	0.99	3.27	0.88	3510	2763	0.65	38.7	8.8	6.2	56	2.08	15.3	2.26	13.04	22.76	4.63	7.43	31	157	475.758	0	0	0	76.037	58.49	38.9933	1
156	0	55	1	0	0	0	36.4	92	20	97	0	1	24.72	16.61	14.1	0.848886	0.85	1.43	408	45.5	41.1	13.1	0.97	5.77	0.76	367.4	278	0.049	43.4	14.4	5.4	57	2.26	6.3	1.49	8.77	15.95	2.23	7.45	28	137	652.381	0	0	0	48.7987	54.83	59.9475	0
157	0	52	0	1	0	0	38	92	21	96	0	1	12.89	20.25	17.56	0.86716	2.55	0.08	341	37.5	33.2	11.6	0.85	3.63	0.81	54.5	84	0.05	53.2	13.1	2.72	189	2.22	14.8	4.08	14.04	29.77	4.22	7.4	39	89	306.897	0	0	0	50.79	48.0467	42.3622	0
158	0	42	1	0	0	0	36.8	81	22	129	0	1	7.46	19.28	16.87	0.875	0.02	2.36	263	40.8	33.1	12.5	0.92	4.4	0.56	634.4	900	0.54	46.7	3.2	5.04	49.3	2.37	12.4	3.71	13.93	36.48	3.23	7.45	41	94	229.268	0	1	0	35.84	56	33.04	1
159	0	55	0	0	1	0	36.5	80	20	134	0	0	2.38	15.05	13.21	0.877741	0.62	1.19	205	37.5	33.4	11.9	0.88	3.49	0.4	160.4	154	0.04	43.8	4.4	4.25	38.9	2.67	6.1	2.57	11.45	30.63	7.53	7.32	32	104	315.152	0	0	0	48.91	50.28	33.52	1
160	1	60	0	0	0	0	36.6	115	22	128	0	1	259.226	12.14	10.56	0.869852	0.83	0.74	110	28	43.3	14.9	1.22	9.85	5.06	187.7	200	32.71	27	17.8	20.5	308	0.98	9.8	1.5	6.01	7.8	3.8	7.28	28.4	59	143.902	0	1	1	52.0599	53.67	29.3396	1
161	0	38	1	0	0	0	36.4	93	20	92.6667	0	1	131.25	14.12	11.35	0.803824	0.72	1.82	148	47	45.5	13.3	1.01	5.11	0.5	47.2	37	0.11	43	20.4	4.3	80	2.22	7.7	3.27	10.25	10.48	2.28	7.45	30	91	313.793	0	0	0	50.94	54.62	42.2811	0
162	0	44	0	0	0	0	37.3	137	20	102	0	1	13.58	27.99	26.11	0.932833	1.06	0.81	338	41.4	34.7	13.2	1.01	3.84	0.68	989.1	1096	0.01	41.7	4.3	3.49	31.1	2.38	7.22	3.82	10.1	23.6	7.61	7.36	34	107	509.524	0	0	0	54.2662	57.73	49.0705	0
163	0	39	0	0	0	0	37.2	104	20	98	0	1	152	18.71	17.12	0.915019	0.56	0.97	264	38.3	45.8	13.9	1.07	5.07	0.13	374.1	207	0.355	36.6	18.7	1.3	37	1.81	18.3	4.63	6	7.22	1.12	7.39	33	137	334.146	0	0	0	47.38	51.38	34.2533	1
164	0	36	1	1	0	1	37	93	21	112.333	0	1	44.26	10.43	8.45	0.810163	0.31	1.56	227	46.7	33.9	13.1	0.97	3.47	4.12	286.5	133	0.21	57.8	47	2	30	2.4	15.3	2.1	12.3	73.3	3.4	7.16	23	146	442.424	0	0	0	43.5233	44.9267	41.91	0
165	0	36	1	0	0	0	36.3	94	20	129	0	1	136.9	13.39	9.6	0.716953	0.07	3.62	205	41.7	36.1	12.8	0.96	4.39	0.61	66.3	35	0.18	42.2	17.9	4.9	49	2.21	20.6	1.93	12.45	31.69	2.15	7.29	29	99	300	1	0	0	46.37	45.39	32.2269	0
166	0	33	1	0	0	0	37.6	94	21	112.667	0	1	68.77	14.81	12.14	0.819716	1.25	1.37	232	38.4	41	13.7	1.07	4.64	0.64	2318	300	0.05	41.1	14.1	3.5	74	2.15	6.46	1.6	7.33	16.43	0.62	7.47	34	131	396.97	1	0	0	53.1167	56.79	45.7556	0
167	0	44	0	0	0	0	36.5	95	18	102.667	0	0	99.72	7.25	6.45	0.889655	0.23	0.54	176	32.3	39.7	13.7	1.07	4.38	0.86	131.6	44	0.15	38.2	26.6	1.1	45	2.09	9.2	3.1	6.18	11.32	0.72	7.39	34	98	466.667	0	0	0	35.8467	52.7267	43.9456	0
168	0	34	1	0	0	0	36.5	95	20	92	0	1	10.76	15.98	13.68	0.85607	0.79	1.44	262	43.9	28.2	12.3	0.95	3.48	0.76	3044	1817	0.09	43.9	18.8	3.7	40	2.35	18.8	2.97	11.23	38.01	1.87	7.37	34	135	642.857	0	0	0	44.5092	38.37	34.0214	0
169	1	34	1	1	0	0	36.8	98	21	108	0	1	108.37	17.5	15.09	0.862286	0.89	1.49	262	52.3	33.3	12.5	0.93	3.62	1.08	1172.2	690	0.06	51.5	12.6	4.9	19	2.52	11.3	3.32	12.7	45.28	3.24	7.44	17	159	481.818	0	0	0	19.4502	29.47	19.6467	1
170	1	34	1	0	0	0	36.9	167	21	98.3333	0	1	115.62	11.93	10.92	0.915339	0.29	0.72	298	49	36.1	12.4	0.94	4.46	0.64	492.7	209	0.53	29.7	39.2	3.8	77	1.53	13.74	3.03	7.49	26.43	0.66	7.27	41	124	375.758	1	1	1	37.5467	52.3833	34.8233	1
171	0	53	1	0	0	0	37.1	95	20	97	0	1	33.25	19.58	17.34	0.885598	0.98	1.22	113	48.6	31	12.8	0.96	3.44	0.69	935	868	0.17	46.6	18.1	7.7	79	2.28	8.02	2.57	7.12	13.04	2.66	7.39	40	131	319.512	0	0	0	40.7233	56.6467	48.9678	0
172	1	34	0	1	0	0	36.5	124	22	88	0	1	201.9	12.84	10.68	0.831776	0.4	1.73	306	39.5	39.9	14	1.06	9.8	4.13	58.7	45	2.3	36.1	31.1	10.54	69	1.82	21.9	2.18	12	6.46	4.2	7.53	25.3	126	252	1	0	0	59.5616	53.18	29.0717	1
173	1	53	1	0	0	0	38	101	22	115.333	0	1	62.27	6.71	6.03	0.898659	0.2	0.46	152	39.7	38.8	15.8	1.27	8.66	4.4	145.8	163	0.428	29.7	35.5	4.58	55.1	1.17	16.2	2.66	8.55	13.68	1.3	7.39	32	98	239.024	0	1	0	60.49	59.17	30.9656	1
174	0	32	1	0	0	0	36.5	93	20	113.333	0	1	80.45	15.45	12.37	0.800647	1.02	1.07	207	44.7	40.8	14.1	1.08	5.25	0.58	5.2	29	0.18	36.2	11.4	3.4	46	2.46	12.4	1.8	11.69	25.2	2.89	7.34	31	118	357.576	0	0	0	49.0767	56.41	37.4186	1
175	1	45	0	0	0	0	36.4	93	21	83	0	1	104.38	5.94	4.76	0.801347	0.28	0.89	147	40	51	19	1.55	4.67	2.26	1422.1	849	4.61	25.5	91.3	3.6	48	1.2	26.57	3.98	6.47	17.41	0.81	7.24	34	124	302.439	1	0	0	43.2516	56.91	37.7503	1
176	1	30	1	0	0	0	36.6	106	21	126	0	1	99.52	18.63	15.57	0.835749	1.42	1.41	120	36.1	32.3	12.3	0.91	3.04	3.87	5388.6	2071	0.12	38.7	12.4	4.5	99	1.96	12.7	2.9	17.42	84.95	0.81	7.4	29	94	284.848	1	1	0	40.03	35.8367	42.9	0
177	1	33	1	0	0	0	36.7	180	21	95.6667	0	1	199.8	4.08	2.92	0.715686	0.44	0.65	242	56	41.9	14.4	1.1	5.56	1.64	282.2	572	8.519	37.2	16.2	8.8	122	1.62	17.16	10.31	10.95	26.71	1.29	7.23	28	70	170.732	1	1	1	44.3843	49.87	34.7428	1
178	1	26	1	0	0	0	37	133	22	75.3333	0	1	321.9	16.92	14.92	0.881797	0.85	1.12	321	57.7	31.7	12.5	0.92	5.32	1.48	1351	1152	2.929	42.8	2.9	3.95	73.3	2.56	15.4	7.64	20.16	58.86	4.43	7.33	27	126	381.818	1	0	0	45.8832	52.14	36.498	1
179	0	37	0	1	0	0	36.5	95	22	75.6667	0	1	44.37	19.31	16.99	0.879855	0.73	1.53	168	37.8	33.4	13.6	1.03	6.28	1.63	27.1	26	0.082	33.5	27.3	1.82	46.4	2	8.5	1.75	7.91	7.99	1.94	7.37	30	98	466.667	0	0	0	35.173	41.38	35.0351	0
180	0	53	1	0	0	0	36.8	95	23	112.333	0	1	1.13	13.03	6.46	0.495779	1.1	6.07	264	45.1	31.1	12.6	0.96	2.85	1.08	2486	1798	0.01	56.7	2.6	5.1	74	2.42	8.4	1.98	8.7	31.1	1.95	7.34	46	95	452.381	0	0	0	59.87	38.4167	43.0678	0
181	0	45	0	0	1	0	36.5	96	18	122.667	0	1	15.18	18.19	16.82	0.924684	0.95	0.8	180	42	45.5	15.6	1.23	4.67	1.39	463.4	246	0.05	49.6	16.3	4.26	33.6	2.23	7.18	1.84	9.5	37.48	2.82	7.42	32	132	400	0	0	0	55.36	53.63	40.5333	0
182	0	29	1	0	0	0	36.5	96	19	135.667	0	1	207.49	13.32	11.89	0.892643	1.32	0.03	226	47.7	32.5	11.8	0.85	4.93	1.36	2756	733	0.17	36.3	13.9	5.3	176	2.22	23.4	2.37	19.41	63	4.99	7.42	32	99	471.429	0	0	0	52.13	50.4967	38.2544	0
183	1	49	1	0	0	0	36.9	107	21	107.667	0	1	138.66	10.36	8.66	0.835907	0.95	0.66	79	23.2	35.7	13.6	1.06	7.2	18.44	180.1	155	8.48	32.2	239.1	11.8	273	2.2	13.1	1.2	4.08	7.26	0.57	7.38	33	104	160	1	1	1	34.2467	52.0567	37.2411	0
184	0	38	1	1	0	0	37.8	87	21	100.333	0	1	119.8	17.34	14.2	0.818916	0.59	1.09	209	49.9	37.4	12.3	0.95	5.12	0.51	2814	237	0.1	58.5	6	4.29	69.9	2.25	21.2	1.99	14.56	57.76	2	7.33	33	87	263.636	0	0	0	56.4616	54.29	37.6411	1
185	0	44	1	0	1	1	37.6	96	20	126.333	0	1	30.67	15.89	12.78	0.804279	6.7	2.02	217	46	44.6	14.2	1.09	5.5	0.57	115.3	60	0.01	39.8	8.4	5	59	2.3	6.41	3.33	5.56	7.43	1.11	7.36	30	128	387.879	0	0	0	52.09	52.02	37.2689	0
186	0	31	1	1	0	0	36.8	96	20	120.333	0	0	5.38	8.93	6.83	0.764838	0.09	1.9	161	50.1	31.3	12.4	0.91	5.35	1.45	39	19	0.066	47.8	14.2	4.2	31	2.42	12.8	2.08	8.7	29.27	2.26	7.38	38	110	379.31	0	0	0	36.1842	46.39	37.4213	0
187	0	36	1	0	0	0	36.4	96	21	108.333	0	1	131.9	23.09	20.43	0.884799	1.8	0.76	381	45.7	34	12.6	0.95	5.87	1.29	264.9	244	0.09	51.8	12.6	2.39	43.8	2.16	19	2.22	14.1	30.15	2.31	7.33	31	87	212.195	0	0	0	43.416	54.27	37.6272	1
188	0	48	0	0	0	0	37	96	21	122.667	0	1	5.7	12.73	11.43	0.897879	0.04	1.16	248	37.5	39.1	12.4	0.93	2.66	1.39	183.8	121	0.04	43.7	2.6	2.67	33.2	3.01	10.8	2.68	12.16	39.16	1.76	7.36	30	136	412.121	0	0	0	42.59	39.37	41.076	0
189	0	47	1	1	0	0	36.5	97	18	108.667	0	1	15.08	9.78	7.06	0.721881	0.55	2.1	173	43.3	32	12.2	0.9	3.08	1.25	251.8	89	0.07	44.6	12.2	5.5	89	2.34	10.2	1.73	7.1	13.28	1.16	7.39	28	159	757.143	0	0	0	53.415	59.35	46.8865	0
190	0	21	1	0	0	0	37	97	20	87	0	1	44.2	14.56	13.09	0.899038	1.22	0.17	235	42.8	32.8	12.7	0.95	4.65	0.65	295.4	216	0.04	44.2	13.9	6.5	22	2.32	11	1.78	23.35	62.08	6.1	7.35	35	143	433.333	0	0	0	52.89	53.2	37.5947	0
191	0	45	1	1	0	0	36.5	99	21	107.667	0	1	229.7	17	13.07	0.768824	0.03	3.66	326	44.5	41.4	12.7	0.96	4.12	0.71	914.5	376	0.19	43.9	18.8	3.3	5	2.26	14.79	2.19	11.5	48.78	2.68	7.46	33	77	233.333	0	0	0	33.2373	48.17	33.0767	1
192	1	70	0	0	1	0	36.5	100	21	71.6667	0	1	87.74	22.11	20.63	0.933062	0.8	0.64	157	52.2	38.6	14.2	1.1	3.48	22.23	2532	3682	3.48	44	39	5.5	108	1.84	11.8	4.99	6.55	21.32	1.39	7.37	35	77	233.333	1	0	0	56.27	54.22	37.2311	1
193	0	70	1	1	1	0	37.1	72	21	120	0	1	33.1	19.14	15.92	0.831766	0.98	2.18	216	46.1	36.1	12.6	0.98	5.07	0.42	1269.8	834	0.13	38.6	11	5.86	87.7	2.5	11.22	1.71	8.79	17.33	1.42	7.44	36	147	445.455	0	0	0	50.2957	55.27	36.294	1
194	0	50	1	1	0	0	37	122	21	87.6667	0	1	374.2	14.02	12.69	0.905136	0.46	0.83	125	46.8	46.6	13.6	1.18	9.71	3.43	212.5	116	0.47	35.8	16.8	3	72	1.78	11.1	4.39	14.74	23.11	2.41	7.48	27	72	175.61	0	1	0	36.9058	51.98	35.6929	1
195	0	38	1	1	0	0	37.8	87	21	96.3333	0	1	332.3	6.55	4.94	0.754198	0.3	1.19	114	38.8	37.4	12.3	0.94	5.12	1.25	497.2	368	0.184	58.5	6	4.29	69.9	2.21	21.2	1.99	14.56	57.76	2	7.33	33	87	217.5	1	1	1	57.68	57.3	38.773	1
196	0	35	1	0	1	0	37	97	20	108.667	0	1	2.33	15.37	14.28	0.929083	0.49	0.6	221	44.1	30.3	11.8	0.9	3.19	0.86	1197	1467	0.31	49	8	6.34	85.2	2.56	9.9	2.56	8.06	16.67	3.65	7.45	45	120	413.793	0	0	0	56.89	53.6367	41.67	0
197	1	50	1	0	0	0	36.8	116	21	85.3333	0	1	139	9.7	8.45	0.871134	0.58	0.65	185	49.7	45.3	16.6	1.31	9.79	5.55	1489.8	984	0.67	37.8	42.2	15.2	169	1.47	26.5	3.43	6.28	6.71	1.07	7.37	22	77	187.805	1	1	1	56.36	55.67	37.4845	1
198	0	31	1	0	0	0	36.5	103	21	105.333	0	1	103.78	14.81	11.52	0.777853	0.81	2.37	305	38.7	35	13.8	1.11	7.11	5.37	197.2	78	0.08	38.2	10.1	3.6	55	2.11	11.5	2.34	8.2	9.37	3.75	7.31	32	97	293.939	0	0	0	58.4304	52.17	34.6061	1
199	0	52	0	1	0	0	36.5	101	21	87.6667	0	1	131.44	15.73	14.1	0.896376	0.66	0.92	219	36.7	37.7	13.7	1.09	5.09	0.49	427.5	262	0.43	39	42.7	5.1	37.7	2.05	17.87	4.5	5.08	7.08	0.93	7.39	36	91	221.951	0	1	1	45.3792	52.16	34.2517	1
200	0	50	1	0	0	0	36.8	98	18	117	0	1	11.17	13.23	11.44	0.864701	0.5	1.18	242	47.7	32.7	12.4	0.9	3.62	0.51	275.3	133	0.05	46.6	9.8	4.7	61	2.48	8.2	2	4.38	6.29	0.96	7.35	35	106	504.762	0	0	0	61.37	60.49	56.8606	0
201	0	30	1	1	1	0	37.6	122	21	139	0	1	19.38	17.28	14.83	0.858218	0.81	1.61	237	45.7	39	12.6	0.97	5.67	0.8	149.6	93	0.12	44.5	11.1	3.43	43.7	2.4	11	1.88	6.73	14.58	1.55	7.43	30	116	282.927	0	0	0	39.0997	55.07	36.1626	1
202	0	48	1	0	0	0	37.3	98	20	118	0	1	67.87	14.96	13.34	0.891711	0.28	1.3	188	46.1	41.5	13.1	1	5.57	0.56	125.1	60	0.11	37.5	19.1	3.88	61	2.11	9.2	2.55	6	11.8	2.21	7.38	28	97	461.905	0	0	0	49.81	53.9	40.67	0
203	0	39	1	1	0	0	36.6	98	20	93.3333	0	1	18.9	14.22	12.97	0.912096	0.49	1.02	137	44.9	31.7	13.8	1.06	3.53	0.93	1387.2	1288	0.2	44.3	11	4.25	40.2	2.27	16.9	1.91	9.14	22.48	5.81	7.27	31	124	427.586	0	1	1	44.8048	54.64	40.4336	0
204	0	50	1	0	0	0	37	99	21	104.333	0	1	49.14	10.03	7.69	0.7667	0.53	1.75	203	41.7	36	13.9	1.09	4.03	1.32	100.3	124	0.02	43.1	13.6	3.1	56	2.18	3.93	2.2	11.45	15.11	1.24	7.4	30	89	269.697	0	0	0	24.6467	57.8967	53.0222	0
205	0	36	1	0	0	0	36.5	98	22	124.667	0	1	91.83	14.86	11.51	0.774563	0.92	2.21	175	45.4	33.2	15.6	0.99	5.45	1.35	44.7	47	0.08	47	13.4	3.6	59	2.3	13.5	2.3	6.8	9.03	1.65	7.43	39	140	666.667	0	0	0	29.97	53.9967	47.5922	0
206	0	27	1	0	0	0	38	110	21	79	0	1	16.37	7.91	6.53	0.825537	0.44	0.93	115	37.6	45.5	14.4	1.11	11.17	4.23	79.1	62	0.14	34.1	33.6	3.89	56.8	1.98	4.18	2.71	7.24	16.06	0.51	7.54	22	80	242.424	0	1	0	43.4505	52.35	34.0275	1
207	1	55	1	0	0	0	36.3	116	43	113.333	0	1	54.17	7.12	5.68	0.797753	0.52	0.9	208	55.9	31.9	14.2	1.11	3.38	1.92	739.4	298	10.28	34.1	9.8	9.5	99	1.42	12.9	8.16	12.22	35.02	1.19	7.205	23	150	300	0	1	1	42.6348	54.66	35.7112	1
208	1	39	0	1	0	0	37	90	21	87	0	1	252.3	5.98	5.15	0.861204	0.23	0.57	255	47.6	43	16	1.28	10	4.59	1649.1	572	27.26	32.6	19.7	2.87	18.6	1.67	38.9	1.64	10.3	14.78	3.27	7.371	21	88	214.634	1	0	0	21.4539	55.01	35.5731	1
209	0	35	1	0	0	0	36.5	99	20	99.6667	0	1	44.29	15.01	12.5	0.832778	0.62	1.61	162	41.4	21.4	14.8	1.27	2.27	0.37	556.4	114	0.07	45.2	11.2	2.3	2.5	2.01	7.1	2.3	6.35	6.9	4.7	7.31	28	101	306.061	0	0	0	43.5933	27.0167	45.0322	0
210	0	49	0	0	0	0	37.7	99	20	106	0	1	7.9	17.3	16.16	0.934104	0.43	0.69	237	39.5	30.5	14.4	0.97	3.65	0.52	425.2	708	0.17	46.8	18.5	5.29	41.4	2.3	13.5	3.27	7.73	12.26	1.18	7.53	22	115	348.485	0	0	0	49.67	43.08	32.31	0
211	0	58	0	0	0	0	36.6	98	21	102	0	1	4.39	6.09	4.69	0.770115	0.01	1.35	112	36.2	36.1	12.3	0.9	2.98	0.54	67.2	61	0.02	43	8.7	5.7	32	2.26	9.8	1.85	11.65	40.11	2.24	7.35	28	98	296.97	0	0	0	49.0506	56.38	36.0832	1
212	1	30	1	0	0	0	37.6	94	21	84.3333	0	1	109.37	14.87	12.51	0.841291	1.28	1.04	246	42.6	33	12.5	0.93	2.66	1.24	321	204	0.094	43.5	15.8	5.6	31	2.06	7.4	3.13	10.98	45.38	1.9	7.35	28	102	309.091	0	1	1	39.7712	59.36	38.7819	1
213	0	27	1	0	0	0	38	109	21	79	0	1	2.38	7.91	6.53	0.825537	0.44	0.93	115	37.6	45.5	14.4	1.11	11.17	4.23	156.9	97	1.09	34.1	33.6	3.89	56.8	1.98	10.4	2.17	7.24	16.06	0.51	7.54	22	80	242.424	0	1	0	38.9712	42.36	31.064	0
214	0	34	1	1	0	0	36.5	100	19	109.667	0	1	72.54	15.22	13.46	0.884363	0.56	1.14	223	50.6	46.5	15.4	1.23	2.63	0.73	934.3	295	0.21	46.3	15.4	5.5	66	2.27	7.9	2.4	7.64	32.87	0.64	7.39	37	107	509.524	0	0	0	58.49	55.04	52.91	0
215	0	34	1	1	0	0	37.6	100	20	96.6667	0	1	165.48	9.11	7.59	0.83315	0.67	0.84	158	44.2	38.2	13.9	1.11	5.23	0.54	1146.9	807	0.83	37.3	13.5	3.6	47	1.86	14.9	2.43	9.03	10.31	2.12	7.24	27	117	354.545	0	1	0	54.957	52.34	47.2805	0
216	0	50	1	0	0	0	36.5	112	21	94.3333	0	1	19.37	22.09	19.88	0.899955	0.9	12.8	196	49.2	30.2	12.9	1.01	3.26	0.89	687	1075	0.08	50.9	13.8	8	24	2.26	8.79	3.5	10.71	41.38	1.31	7.34	40	87	263.636	0	0	0	30.8133	52.7367	44.43	0
217	1	43	0	0	0	0	38.2	117	22	104.667	0	1	79.06	23.34	21.61	0.925878	0.68	1.03	105	39.6	35.3	12.6	0.95	4.09	0.68	1194.42	778	0.1	40	12	2.52	28.5	2.27	12.62	3.45	13.59	31.31	4.09	7.4	24	87	300	0	1	1	26.1433	50.2433	40.0022	0
218	0	30	1	0	0	0	36.5	100	20	102.667	0	1	39.57	8.55	6.23	0.728655	0.02	2.2	276	46.9	35.8	11.8	0.87	2.49	0.59	856.3	350	0.048	44.5	5.8	5.59	62.1	2.45	11.7	3.23	11.37	23.49	6.6	7.34	31	98	466.667	0	0	0	58.0608	53.76	45.1584	0
219	0	26	0	0	0	0	37.9	100	22	91.6667	0	1	85.41	4.74	3.72	0.78481	0.11	0.89	102	42.2	29.1	12.4	1.04	4.6	3.68	145.8	47	0.29	28.5	10.1	5.5	58	1.59	11.84	2.6	4.91	10.97	0.47	7.42	32	101	306.061	0	1	0	34.9833	49.3633	43.1678	0
220	0	23	1	0	0	0	36.6	102	20	104	0	1	110.92	14.46	11.21	0.775242	0.63	2.53	380	43.2	20.1	17.9	1.09	2.26	1.12	177.1	63	0.02	45.6	6.3	2.2	23	2.23	13	2.2	14.83	49.56	1.06	7.36	32	103	312.121	0	0	0	24.1267	52.51	44.0478	0
221	1	39	0	0	0	0	36.4	94	21	126.667	0	1	78.38	12.56	11.09	0.882962	0.43	0.99	132	35.1	33.2	14.1	1.09	3.15	1.34	4025	2422	0.12	47.6	11.4	4.9	31	2.22	9.8	4.03	5.04	22.49	1.61	7.38	39	118	287.805	0	1	0	48.97	49.53	30.7086	1
222	0	40	1	0	0	0	36.6	102	21	99.6667	0	1	31.95	6.31	3.9	0.618067	0.43	1.74	154	48.6	30	12.3	0.93	5.63	1.04	44.4	44	0.1	44.3	13	4.2	66	2.23	5.5	1.7	9.29	8.31	3.88	7.35	30	112	533.333	0	0	0	24.2033	55.69	47.3589	0
223	0	35	1	0	0	0	36.9	102	22	102.333	0	1	12.63	15.54	13.77	0.8861	0.63	1.08	254	47.9	32.1	13	1	3.32	1.25	174.5	106	0.02	44.8	23.3	6.6	48	2.22	12.95	2.56	4.92	19.55	1.1	7.35	31	102	485.714	0	0	0	56.6364	51.96	45.7248	0
224	1	44	0	1	0	0	37	110	20	92.3333	0	1	107.2	14.51	13.03	0.898001	1.06	0.42	186	37.6	27.1	13.1	1	2.51	5.36	1932.2	1835	0.049	67.4	24.2	4.85	50.3	1.41	18.9	2.29	20.63	28.55	3.62	7.3	40	172	419.512	0	1	0	56.5161	54.87	38.409	1
225	1	37	1	0	0	0	36.1	170	22	115	0	1	326.2	12.97	10.58	0.815729	0.3	2.05	297	56.2	32.7	12.5	0.92	3.55	1.17	1713	946	7.03	25	18.1	5.7	94.5	1.66	8.5	5.36	9.15	30.72	0.63	7.36	28	158	385.366	1	1	0	54.2484	50.23	32.6495	1
226	1	28	1	0	0	0	37.1	104	21	114	0	1	119.58	5.02	3.67	0.731076	0.36	0.93	228	54.3	38.8	14.7	1.15	3.92	2.78	789.3	152	2.17	35.3	13.3	5.3	124	1.56	12.58	4.9	4.44	8.6	1.23	7.33	33	88	266.667	1	1	1	64.2692	51.83	31.9618	1
227	0	57	0	0	0	0	37.2	96	21	121.333	0	1	5.34	13.81	11.95	0.865315	0.4	1.42	221	38.9	36.8	12.3	0.9	3.28	0.51	1102.8	1253.4	0.01	45	9.9	3.79	38.9	2.38	25.4	2.25	16.28	20.06	6.25	7.4	41	98	280	0	0	0	40.86	52.3933	32.0178	1
228	0	35	1	0	0	0	36.9	102	22	102.333	0	1	12.63	15.54	13.77	0.8861	0.63	1.08	254	47.9	32.1	13	1	3.32	1.09	420.2	239	0.15	44.8	23.3	6.6	48	2.22	21.7	2.56	4.92	19.55	1.1	7.38	30	148	448.485	0	0	0	58.01	49.33	46.25	0
229	0	52	1	0	0	0	36.3	103	19	93	0	1	174.66	12.76	11.13	0.872257	0.69	0.79	133	46.7	35	13.8	1.08	6.81	0.97	70.7	37	43	19.5	3.6	65	5.9	2.22	7.42	1.25	8.21	6.44	2.65	7.39	30	106	504.762	0	0	0	59.47	58.15	44.3478	0
230	0	51	1	1	0	0	38.6	104	21	98.6667	0	1	116.64	5.06	4.16	0.822134	0.28	0.6	92	44.1	37.2	12.4	1.12	2.19	2.34	144.1	133	0.59	40.4	35.3	4.67	7.34	2.09	18.5	2.5	5.98	9.28	0.62	7.41	36	114	542.857	0	0	0	61.4718	55.38	35.997	1
231	0	34	0	1	0	0	36.5	103	21	94.6667	0	1	27.57	11.38	7.6	0.667838	0.01	3.51	339	40.6	31.6	11.6	0.83	3.24	0.65	69.7	32	0.06	51	24	3.42	29.3	2.4	13	2.77	7.42	29.26	2.08	7.35	40	110	333.333	0	0	0	50.3067	47.2633	48.52	0
232	0	36	1	0	0	0	36.8	103	21	101.333	0	1	51.41	15.31	10.8	0.705421	0.12	4.11	298	46.1	39.1	12.6	0.92	3.14	0.63	608.9	76	0.09	51.1	3.3	4.3	41.2	2.33	14.8	3.92	10.69	30.81	1.52	7.45	31	124	375.758	0	0	0	39.7867	51.3333	41.41	0
233	0	34	1	0	0	0	36.9	105	20	117.333	0	1	184.34	13.18	10.59	0.80349	0.83	1.56	223	41.4	43.9	14.5	1.07	6.29	0.34	109	68	0.01	41	9.7	2.55	53.4	2.1	6.1	2.56	5.67	5.88	1.75	7.4	30	115	348.485	0	0	0	56.859	51.69	33.5985	1
234	0	56	1	0	1	0	36.9	123	21	105.333	0	1	25.68	14.99	13.66	0.911274	0.52	0.8	171	50.2	32.8	13.5	1.04	5.23	0.5	367.2	251	0.52	38.7	10.9	4	54	1.96	18.6	2.8	4.3	8.62	0.52	7.46	31	91	245.946	1	0	0	27.74	48.6933	47.8311	0
235	0	52	0	1	0	0	36.5	85	21	87.6667	0	1	131.44	15.73	14.1	0.896376	0.66	0.92	219	36.7	37.7	13.7	1.09	5.09	0.45	427.5	262	0.43	39	42.7	5.1	37.7	2.05	17	4.5	5.08	7.08	0.93	7.39	36	91	227.5	0	1	0	38.6784	56.88	32.232	1
236	0	41	1	0	0	0	37	104	22	92	0	1	96.82	10.68	7.6	0.71161	0.79	1.49	236	41.3	33	13.8	1.09	5.22	0.19	65.2	64	0.06	42	14.2	3.7	63	2.23	7.5	2.53	7.43	8.37	2.13	7.45	30	121	576.19	0	0	0	53.16	54.1667	46.7978	0
237	0	52	1	0	0	0	36	105	21	102.333	0	1	251.21	17.98	16.52	0.918799	0.44	0.99	167	46.5	31.1	13.2	1.05	7.05	2.11	159	65	0.48	40	18	3	105	1.95	12.6	3.4	4.9	6.97	0.91	7.48	32	85	207.317	0	1	0	52.7583	54.39	29.9145	1
238	0	35	1	0	0	0	36.8	109	20	106.667	0	1	29.37	17.22	15.58	0.904762	0.55	1.07	243	48.2	38.8	12.8	0.95	2.4	1.1	238.5	95	0.04	53.5	15.8	4.5	47	2.35	7	2.95	6.75	34.7	1.55	7.38	28	112	339.394	0	0	0	55.9908	54.36	35.1528	1
239	0	34	1	0	0	0	36.4	105	19	115	0	1	38.89	13.63	11.55	0.847395	0.86	1.08	188	47.3	36.3	13.6	1.02	4.9	1.29	32.5	57	0.11	40.3	3.7	3.81	62.8	2.08	9.5	1.97	5.63	13.52	2.32	7.4	34	98	466.667	0	0	0	58.2608	56.02	54.1527	0
240	1	47	0	0	0	0	36.9	119	20	94.6667	0	1	191.95	11.05	10.19	0.922172	0.4	1.89	211	47.3	24	16.7	0.98	4.24	1.27	2005	1089	1.32	31.2	16.2	5.66	4.13	1.53	13.4	8.06	7.05	14.77	2.54	7.33	32	93	232.5	0	1	1	40.7367	51.1	35.7456	1
241	0	31	1	0	0	0	37.8	105	19	92.3333	0	1	23.57	13	10.7	0.823077	0.34	1.95	147	48.8	36	13.1	0.97	5.01	1.33	140	107	0.08	43.9	14.2	2.5	70	2.17	6.32	1.58	5.47	5.91	1.2	7.41	32	106	504.762	0	0	0	61.36	25.4233	47.2311	0
242	0	32	0	1	0	0	36.7	105	20	106.333	0	0	2.76	10.47	7.94	0.758357	0.36	2.12	307	40.6	33.2	12.4	0.91	3.7	0.42	156.1	121	0.12	44.7	3.5	5.5	21.4	2.43	15.9	2.31	11.51	26.95	1.95	7.42	35	127	384.848	0	0	0	55.38	54.6633	53.8544	0
243	1	47	0	1	1	0	36.9	119	20	94.6667	0	1	102.75	13.51	12.2	0.903035	0.43	0.88	218	50.9	31.3	12.9	0.98	4.24	1.27	2005	1089	1.32	31.2	16.2	5.66	41.3	1.53	13.4	8.06	7.05	14.77	2.04	7.33	32	93	226.829	0	1	1	43.25	51.5933	36.0767	1
244	0	35	1	0	0	0	37.3	99	20	112.333	0	1	30.7	15.04	12.26	0.81516	0.62	2.09	277	44.3	31.7	11.8	0.89	4.63	0.45	184	33	0.04	46.4	4.1	3.99	45.3	2.65	7.2	2.47	20	63.2	0.59	7.42	36	66	227.586	0	0	0	46.8648	50.94	35.4882	1
245	1	26	1	0	0	0	37.7	104	21	110	0	1	366.93	17.29	15.01	0.868132	1.11	1.16	134	40	36.8	13.7	1.05	6.72	0.39	110.9	64	0.23	33.8	13.9	2.14	4.84	2.03	13.55	20.9	5.06	10.18	1.22	7.38	30	174	435	0	1	1	51.64	49.0867	31.4311	1
246	0	46	1	0	0	0	36.5	105	20	82	0	1	13.73	20.58	19.24	0.934888	0.7	0.64	223	49.6	37.9	13.4	1.03	9.47	0.97	292	171	0.365	36	18	5.99	69.7	2.09	6	2.4	10.96	16.42	6.74	7.36	33	124	590.476	0	1	0	54.0441	52.47	38.478	0
247	1	39	1	1	0	0	36.6	83	20	110	0	0	265.28	7.37	6.43	0.872456	0.42	0.52	238	24.2	44.1	16.7	1.33	1.97	30	80	65	59.06	30.4	7.4	33.86	636.4	0.65	5.2	1.4	5.61	5.68	2.47	7.2	17	91	275.758	1	0	0	52.97	59.9933	41.62	1
248	1	34	1	0	0	0	38.5	142	20	104	0	0	251.47	17.79	15.39	0.865093	0.87	1.42	207	53.6	37.1	14.9	1.18	6.65	1.78	319	516.3	3.39	40.4	44.3	4.7	65	2.16	17.8	2.23	4.86	8.19	0.56	7.4	34.2	89	197.778	1	1	1	39.27	53.68	38.7322	0
249	1	37	1	1	0	0	36.5	69	20	122.333	0	1	89.41	13.13	10.54	0.802742	0.01	2.38	217	43.1	33	12.3	0.89	3.93	0.61	101.2	49	0.54	46.6	3.7	4.42	37.8	2.64	10.41	3.36	14.12	39.44	1.82	7.29	30	87	212.195	1	0	0	25.4215	39.11	26.9859	1
250	0	35	1	0	0	0	37	114	20	107	0	1	77.18	10.98	9.14	0.832423	0.58	1.23	190	47	36.4	12.2	0.92	4.43	0.68	524.5	225	1.16	36.6	13.5	3.9	66.4	1.86	18.47	2.66	17.71	52.17	5.26	7.39	32	89	306.897	0	1	0	56.41	57.0167	36.4567	1
251	0	38	1	1	0	0	36.5	98	22	101.667	0	1	37.35	15.61	13.27	0.850096	0.21	2.01	349	39.7	35	12.4	0.92	3.75	0.74	1042.7	393	2.69	43	12.6	3.59	54.4	2.1	8.3	2.31	14.5	49.2	3.4	7.42	29	119	360.606	0	0	0	18.7067	55.9033	35.6722	1
252	0	55	1	1	1	0	36.5	106	20	123.333	0	0	0.61	6.09	4.43	0.727422	0.46	0.99	110	41.3	31.5	12.4	0.92	2.72	0.59	941.8	453	0.14	44	11.3	6.5	58	2.08	10	1.8	9.92	28.66	1.45	7.43	34	102	309.091	0	0	0	49.37	53.03	51.5444	0
253	0	48	1	0	1	0	36.7	106	20	151	0	0	6.38	8.31	4.48	0.53911	0.33	3.37	225	49.6	34	12.8	0.96	2.9	0.4	24.4	70	0.08	43.6	7.5	5.47	77	2.26	6.17	2.24	5.69	6.49	2.23	7.38	29	147	700	1	0	0	52.34	51.34	39.7029	0
254	0	28	1	0	0	0	36.3	79	20	105.333	0	0	10.84	8.82	7.11	0.806122	0.36	1.29	327	40.4	34.5	11.6	0.85	3.79	0.85	1129.3	423	0.31	46.7	7.6	5	32	2.36	8.8	2.01	7.25	40.8	1.45	7.43	42	85	293.103	0	0	0	57.39	45.6267	37.97	0
255	0	51	1	0	0	0	36.4	107	23	112	0	1	304.38	14.58	12.54	0.860082	0.87	1.14	230	39.5	36.1	13.1	1	12.71	4.42	207.2	176	0.46	37.8	8.8	11.96	99.5	2.39	27.3	2.22	10.26	6.77	4.63	7.41	31	107	509.524	0	0	0	52.94	53.4567	41.6244	0
256	1	45	1	1	0	0	36.7	75	25	63.6667	0	1	98.75	8.57	5.03	0.586931	0.34	0.46	207	45.2	28.5	17.3	0.99	4.02	2.27	4861	1699	17.3	33.5	8.2	25.8	289	1.87	81.78	2.71	7.87	9.37	2.15	7.54	21	129	390.909	0	0	0	47.056	55.36	35.2459	1
257	0	35	1	0	0	0	36.5	108	21	108.667	0	1	21.33	11.36	8.99	0.791373	0.56	1.51	236	42.1	41.6	11.5	0.83	3.47	3.77	517.9	72	0.01	70.2	10.8	7.62	53.5	2.66	7.6	0.32	12.65	98.7	3.27	7.38	40	99	300	0	0	0	55.7433	42.4867	49.9522	0
258	0	30	1	0	0	0	36.5	98	20	107.333	0	0	0.5	12.83	9.47	0.738114	0.57	2.44	266	43.9	33.5	12.3	0.9	2.31	0.58	831.8	222	0.38	46.2	3.2	4	71	2.35	6.5	3.6	6.5	18.78	1.94	7.36	40	88	266.667	0	0	0	25.1533	52.67	40.2778	0
259	0	37	0	1	0	0	36.5	115	20	94.6667	0	1	24.07	15.63	13.07	0.836212	0.22	2.24	255	39.6	34.1	13.6	1.05	6.32	0.71	120.3	55	0.154	43.1	13.6	3.2	32	2.09	17.33	1.98	13.47	27.8	3.35	7.34	22	93	226.829	1	0	0	44.2814	51.49	35.0132	1
260	0	35	1	0	0	0	36.7	87	20	104.667	0	0	31.73	13.29	10.96	0.82468	0.72	1.54	210	43.9	30.7	11.7	0.86	4.7	0.73	6000	959	0.01	48.5	17.8	3.6	46	2.32	15.49	1.32	11.51	29.6	2.64	7.36	40	72	248.276	0	0	0	53.12	51.6033	34.8811	1
261	0	33	0	1	1	0	37	88	20	112.333	0	0	21.37	8.34	7.2	0.863309	0.17	0.91	309	49.6	39.1	14.4	1.11	7.26	3.59	1442.6	663	0.06	41.5	4	2.99	20.6	1.5	24.1	2.55	19.06	48.65	4.69	7.41	30	108	263.415	0	1	1	28.4333	48.36	34.5433	0
262	1	57	0	0	0	0	37.3	100	20	98.3333	0	1	59.81	11.93	10.59	0.887678	0.48	0.84	198	42	32.2	12.6	0.98	3.98	1.22	528.6	263	0.65	34.4	21.7	3	56	2.24	20.6	2.8	10.14	20.87	1.67	7.42	31	74	180.488	0	1	0	46.3601	52.09	34.9003	1
263	0	33	1	0	0	0	36.5	109	20	112.333	0	1	12.5	17.59	15.23	0.865833	0.94	1.28	175	39.4	32	12.7	0.97	4.21	0.67	574.7	221	0.28	47.8	18.1	3.6	69	2.2	5.9	5.73	5.53	7.64	1.08	7.34	30	112	273.171	0	0	0	48.4947	59.87	40.1129	1
264	1	48	1	0	1	0	37	81	21	110.333	0	1	243.6	9.45	8.25	0.873016	0.31	0.85	160	38.5	46.6	13.9	1.07	9.27	5.42	119.3	68	0.33	38.8	73.5	4.2	59	2.23	8.4	2	8.56	7.49	1.73	7.31	26	114	345.455	1	0	0	49.7332	55.88	35.2044	1
265	1	55	1	1	0	0	37.3	87	20	93	0	1	117.74	9.57	8.61	0.899687	0.42	0.53	208	52.6	33.7	13.6	1.03	7.43	2.92	1043.7	689	7.03	37	20.2	8.9	69.3	1.59	25.19	9.8	20.14	45.96	4.31	7.31	38	114	278.049	0	1	1	47.5024	53.98	36.1666	1
266	0	35	1	0	0	0	36.5	110	18	92.6667	0	1	166.54	16.19	14.64	0.904262	2.8	1.07	229	53.9	34.7	13.6	1.05	4.47	1.67	1131.1	734	0.35	40.3	16.7	8.23	137.4	1.88	22.52	8.27	5.79	9.58	1.25	7.27	27	159	548.276	1	1	0	55.07	54.6067	34.3889	1
267	0	39	1	0	0	0	36.3	108	19	93.6667	0	0	0.5	21.19	18.12	0.85512	0	3.01	180	42.5	30.1	12.1	0.89	3.16	0.76	573.9	287	0.21	47.7	7.2	3.44	39.9	2.61	16.44	2.04	12.5	31.93	3.81	7.4	33	108	514.286	0	0	0	56.14	54.1833	33.9144	1
268	0	51	0	0	0	0	37.3	96	20	112.333	0	1	12.12	13.06	11.98	0.917305	0.47	0.59	182	31.2	29	13.4	1.02	3.23	0.51	377.4	265	0.01	43.4	21.6	35.5	335	2.21	9.2	2.15	5.17	10.61	2.46	7.47	38	81	279.31	0	1	0	54.27	35.66	26.5122	0
269	0	32	1	0	0	0	36.5	138	30	96.6667	0	1	232.64	10.15	9.15	0.901478	0.36	0.62	177	48.5	36.1	14.5	1.16	9.25	2.13	171.8	108	0.45	41.5	27	4.9	70	2.16	15.6	2	6.24	7.15	1.19	7.38	36	130	325	0	0	1	26.83	55.2967	34.2911	1
270	0	50	1	0	0	0	36.8	97	20	111.667	0	0	35.35	6.59	5.18	0.786039	0.22	1.14	131	44	37.7	11.9	0.86	3.08	3.17	107.9	152	0.08	48.5	15	6.5	36	2.35	9.9	1.73	10.04	63.25	10.04	7.41	36	73	178.049	0	0	0	52.37	52.27	36.589	1
271	0	22	1	0	0	0	36.5	111	20	104.333	0	1	306	19.45	16.9	0.868895	1.07	1.46	277	43.7	40.7	13	1.01	8.62	1.05	31.3	22	0.112	46.4	13.1	3.35	61.1	2.48	13.7	3.82	11.04	12.4	1.86	7.26	27	157	541.379	0	0	0	40.4558	56.98	47.6733	0
272	0	31	1	0	0	0	36.5	112	19	82.3333	0	1	11.37	14.85	10.51	0.707744	0.68	3.56	247	52.4	30.5	11.4	0.84	3.18	1.51	966	4246	0.1	48.4	14.9	6.53	77	2.36	9.31	4.06	5.81	6.45	3.79	7.32	27	137	472.414	0	0	0	58.37	52.55	40.0189	0
273	0	53	1	0	0	0	37	112	20	108.667	0	0	31.53	14.51	12.79	0.881461	0.59	1.04	167	46.7	36.4	12.3	0.9	5.31	0.34	55.4	70	0.01	45	16.9	8.6	68	2.22	5.8	2.26	6.68	12.48	3.34	7.43	37	87	414.286	0	0	0	45.66	59.9033	52.0722	0
274	0	45	1	0	0	0	37	102	20	105	0	1	15.94	20.75	18.16	0.875181	0.68	1.85	348	42.9	48	13.1	1	5.4	0.1	270.7	174	0.18	41.5	19	3.11	52.2	2.79	14.2	5.51	8.12	25.2	4.41	7.38	32	72	218.182	0	0	0	45.4727	49.97	47.1384	0
275	0	44	1	0	0	0	36.5	109	19	82.3333	0	0	25.47	15.15	13.6	0.89769	0.87	0.66	314	43	31.2	12.8	1	3.28	0.74	2261.2	948	0.1	43.3	28.2	8.6	65.8	2.07	8.9	2.7	8.94	23.54	0.8	7.39	32	104	495.238	0	0	0	42.6832	57.68	35.7616	1
276	0	40	0	0	0	0	37	112	21	108.333	0	1	52.14	13.55	11.73	0.865683	0.88	0.87	292	43.3	32.6	11.3	0.83	5.64	0.98	69.2	55	0.07	38.8	6.8	3.8	26	2.15	13	1.52	15.61	47.15	1.1	7.24	30	140	424.242	0	0	0	34.5933	50.98	40.8789	0
277	0	46	1	0	0	0	37.3	64	20	91.6667	0	1	17.58	20.72	19.12	0.92278	1.37	0.21	209	47.8	34.8	11.8	0.87	3.57	4.05	1665.1	717	0.04	56	15.4	3.81	23	1.73	10.5	2.45	16.03	79.05	3.31	7.38	41	113	275.61	1	0	0	62.89	60.47	38.9024	1
278	1	50	0	1	0	0	37.3	161	48	67	0	1	78.52	14.27	12.95	0.907498	0.45	0.82	356	53.1	36.1	15.3	1.26	3.63	5.6	12157.5	3440	24.19	28.2	8.9	8.8	298.3	0.53	27	13.3	16.35	58.85	0.09	7.32	31	233	568.293	1	0	0	58.2788	54.98	34.0876	1
279	0	32	1	0	0	0	37.8	112	23	116.333	0	1	2.65	22.23	17.74	0.798021	1.59	2.73	221	42.5	35	13.1	0.97	2.8	3.19	141.3	54	0.01	36.5	13.9	2.6	30	2.25	15.8	4.2	12.71	89.24	0.83	7.3	39	126	381.818	0	0	0	27.58	48.4567	43.4044	0
280	0	40	1	0	0	0	37.1	112	24	118.667	0	1	11.09	13.75	11.4	0.829091	0.76	1.54	193	48	34.8	12.8	0.97	5.01	1.34	48.9	53.1	0.17	41.8	28.3	3.21	69.7	2.28	12.3	4.64	5.71	11.79	1.81	7.41	29	134	638.095	0	0	0	52.14	59.91	47.4356	0
281	0	36	0	0	0	0	36.8	104	20	94.6667	0	1	10.55	16.92	15.52	0.917258	0.48	0.9	164	33.8	32.8	12.8	1	3.58	1	1538.3	565	0.05	37.9	8.9	2.8	75.2	1.84	8.9	1.9	11.54	42.46	0.58	7.42	30	161	268.333	0	1	0	59.2704	52.92	32.8104	1
282	0	44	1	0	0	0	36.5	113	20	102	0	1	147.74	12.21	10.85	0.888616	0.32	1.02	154	45.1	34.9	12.3	0.9	7.56	0.74	240.3	151	0.75	41.5	14.5	2.9	66	2.21	10	2.67	19.15	23.82	4.46	7.32	28	110	268.293	0	0	0	39.7	47.8567	45.8167	0
283	0	32	1	1	1	0	36.7	114	20	122	0	1	193.8	18.1	15.37	0.849171	0.86	1.75	235	54	34.1	12.5	0.93	6.93	0.72	749.2	188	1.65	44.3	9.2	4.8	45	2.27	22.38	2.68	7.53	16.57	2.54	7.42	28	98	239.024	0	0	0	44.6	36.33	49.61	0
284	0	33	1	0	0	0	36.3	113	20	123.667	0	1	65.21	13.79	11.89	0.862219	1.65	0.17	384	49.1	37.1	11.7	0.87	4.73	0.93	536	160	0.18	52.2	2	3.81	68.6	2.35	20.6	3.05	24.1	8.43	5.43	7.36	38	114	393.103	0	0	0	57.73	41.3633	34.1489	0
285	1	28	0	1	0	0	37.7	132	22	103.667	0	1	246.81	7.4	6.31	0.852703	0.35	0.68	312	33.8	39.6	15.4	1.26	8.2	4.82	608.1	209	0.76	29.3	13.7	4.9	63	1.32	13	1.4	12.39	30.58	1.43	7.2	28	137	334.146	0	0	0	46.7755	55.03	34.1186	1
286	0	34	1	0	0	0	36.88	131	20	110	0	1	33.27	12.09	10.57	0.874276	0.62	0.88	225	52	32.8	13.5	1.07	8.41	1.02	732.4	302	0.39	41.9	6.2	3.24	45.3	1.87	16.35	2.63	11.16	18.33	2.76	7.38	37	147	700	0	0	0	54.29	59.54	36.8689	1
287	0	57	0	0	0	0	36.5	114	20	116	0	0	21.77	9.36	8.16	0.871795	0.51	0.75	170	40.6	30.4	11.9	0.86	2.71	0.52	2113	796	0.1	42	18.1	4.7	55	2.18	23.17	2.55	13.6	25.74	2.24	7.29	29	113	342.424	1	0	0	55.01	48.9933	39.2522	0
288	1	33	1	0	0	0	36.4	118	20	105.333	0	1	52.37	19.18	15.67	0.816997	2.74	0.71	285	44	33.7	12.2	0.9	4.02	1.21	345.8	475	0.81	49.7	15.5	4.2	30	2.24	18.56	3.4	18.27	70.93	4.27	7.28	24	86	172	1	0	0	68.8977	62.07	37.8627	1
289	0	49	1	0	0	0	37	114	20	110	0	0	48.28	10.4	9.29	0.893269	0.59	0.5	164	48.1	35.4	12.2	0.9	3.18	0.64	730.3	303	0.33	43.2	16.9	4.46	46.6	2.33	13.5	1.95	9.66	23.17	1.91	7.38	30	167	506.061	0	0	0	42.8433	51.06	39.3356	0
290	0	57	1	0	0	0	37	95	21	133	0	1	0.67	10.65	9.43	0.885446	0.09	1.06	218	48.9	33.7	12.1	0.87	2.09	1.28	455.4	209	0.05	46.1	16.2	6	38	2.37	9.2	3.09	12.4	54.83	2.39	7.35	41	135	465.517	0	1	0	51.96	57.71	35.6022	1
291	0	50	1	0	0	0	37	85	20	109	0	0	7.8	8.48	7.17	0.845519	0.33	0.97	123	40	34.3	13.2	1.02	2.7	0.57	749.3	332	0.15	46.3	17.7	4.18	60.9	2.21	10.5	2.01	6.01	12.21	2.7	7.3	29	92	278.788	1	0	0	53.45	55.26	33.1389	1
292	0	51	0	0	1	0	36.9	104	20	115	0	1	226.7	26.24	24.46	0.932165	0.97	0.79	392	54.2	36	13.3	1.02	5.7	1.03	1488.5	832	0.732	44.4	19	8.63	96.2	2.09	11.41	6.93	7.04	8.76	1.64	7.45	36	122	297.561	0	0	0	44.3456	54.08	30.1045	1
293	0	46	1	0	0	0	36.8	76	18	116.333	0	1	39.37	15.49	13.53	0.873467	0.78	1.13	274	44.2	35.4	12.4	0.96	3.58	1.27	137.8	83	0.47	38.1	8.1	3.81	43.3	2.18	7.2	2.31	10.5	29.38	2.36	7.43	26	127	384.848	0	0	0	60.3988	56.98	34.9477	1
294	0	55	0	0	0	0	36.8	92	20	101.667	0	1	358.5	17.63	16.13	0.914918	0.55	0.86	197	39.4	34.8	13.4	2.02	3.73	1.31	1694.6	368	0.46	44	22.8	4.9	10	1.94	9.45	5.1	6.14	54.48	1.39	7.26	37	97	293.939	0	0	0	47.8388	58.34	30.5313	1
295	1	47	0	0	0	0	36.8	109	18	119.333	0	0	83.47	11.01	9.9	0.899183	0.67	0.43	150	44.5	32.2	12.3	0.92	3.97	1.07	2287	791	7.068	48.9	29.2	3.4	17	2.07	16	3.85	11.88	59.93	2.05	7.31	40	156	472.727	1	0	0	54.68	55.17	33.8376	1
296	1	58	0	0	1	0	36.6	84	19	105.333	0	1	10.17	13.89	12.08	0.86969	1.47	0.32	186	39.1	29.4	12.3	0.9	2.92	1.3	297.2	196	0.62	52.7	5.6	4.25	22.1	2.21	13.01	3.26	18.36	7.35	5.59	7.3	30	89	269.697	1	0	0	19.8167	46.6833	32.2889	1
297	0	44	1	0	0	0	36.5	76	19	82.3333	0	0	6.74	8.42	6.15	0.730404	0.5	1.5	274	36.4	31.2	12.8	1	3.28	0.74	2261.2	948	0.12	43.3	28.2	8.6	65.8	2.04	9.2	2.7	8.94	23.54	0.8	7.32	34	86	260.606	0	1	1	45.9714	45.07	31.0983	1
298	1	39	1	0	0	0	36.4	77	22	60	0	1	153.75	10.59	9.21	0.869688	0.37	1	207	42.3	36.8	14.1	1.09	4.97	3.1	209.6	148	3.61	41.4	1.3	5.64	86.4	1.75	18.6	5.31	7.98	18.61	1.08	7.26	24	167	506.061	1	0	0	46.39	52.15	36.6788	1
299	1	36	1	0	0	0	36.5	69	19	108	0	0	28.59	10.64	9.59	0.901316	0.47	0.51	140	47.8	26	12.8	0.96	3.46	0.53	95.4	92	0.82	41.2	12.1	3.92	85.4	1.07	5.2	1.2	7.22	21.11	1.47	7.36	44	98	239.024	0	1	0	47.5738	60.22	41.5518	1
300	0	31	1	0	0	0	36.5	151	22	112	0	1	229.01	7.28	3.36	0.461538	0.23	0.68	231	46.5	37.1	13.1	1.03	4.45	1.16	996.5	590	0.19	45.4	16.2	4.7	49	1.82	22.5	6.56	10.97	29.44	0.42	7.38	30	137	652.381	0	0	0	58.3648	56.12	34.2332	1
301	0	46	0	0	0	1	37.7	115	22	133.333	0	1	18.41	18.67	17.01	0.911087	0.6	1.03	130	38.1	41.7	12.4	0.92	4.1	0.51	125	95	0.07	42.4	13.9	4.16	52.2	2.5	22.5	1.84	16.2	35.89	2.31	7.34	34	101	306.061	0	1	1	60.22	49.8633	40.9144	0
302	0	46	1	1	0	0	36.6	108	23	148.667	1	1	45.2	10	9.51	0.951	0.1	0.38	176	41.8	27.1	13	0.97	4.74	1.06	3300	1242	4.95	36.3	5.6	24.1	212	2.21	33.3	36.7	11.71	28.21	0.87	7.36	42	109	330.303	0	0	0	52.9267	57.5067	34.9367	1
303	0	32	1	0	0	0	36.4	117	21	116	0	1	62.7	18.04	15.5	0.859202	0.99	1.53	323	49.3	32.9	12.5	0.95	3.86	1.34	52.3	39	0.19	46	22.9	3.93	64.5	2.44	6.8	2.14	5.05	8.6	2.46	7.45	33	129	444.828	0	0	0	46.39	50.7667	41.1222	0
304	0	49	0	1	0	0	36.5	117	21	107	0	1	17.1	16.75	14.32	0.854925	0.07	2.31	198	38.8	29.8	12.4	0.94	2.79	1.07	205.3	134	0.15	41	8.1	4.93	31.8	2.34	15	4.4	12.58	25.79	8.1	7.41	33	134	462.069	0	0	0	59.6527	52.79	54.7256	0
305	0	30	1	0	0	0	37.1	118	23	108	0	1	99.81	10	9.39	0.939	0.68	1.12	188	39.5	33	13.6	1.08	5.68	1.03	87.4	49	0.06	47.9	9.2	3.1	86	2.45	10.58	2.2	3.02	5.92	0.86	7.3	31	124	375.758	0	0	0	15.0933	48.6067	44.8367	0
306	0	33	1	0	0	0	37.3	118	33	90.3333	0	1	154.7	21.14	18.75	0.886944	0.99	1.35	184	47.2	39.7	13.3	1.01	5.45	0.93	187.6	220	2.98	42.3	10.8	2.3	82	1.54	19.3	2.5	8.93	26.84	3.23	7.21	35	141	313.333	0	0	0	57.01	51.6067	39.1322	0
307	1	29	0	1	0	0	36.5	100	19	70.6667	0	1	249.01	24.39	22.04	0.903649	0.72	1.62	511	46.8	39.2	15.8	1.31	6.94	4.35	39.7	711	0.07	38	13.9	11	233	1.48	17.4	6.92	6.7	13.25	0.51	7.37	21	56	136.585	0	1	1	50.3	48.37	33.2141	1
308	1	36	1	0	1	0	37.2	141	33	97.3333	0	1	127.14	16.8	14.9	0.886905	0.75	1.13	408	52.8	35.7	13.6	1.03	5.51	1.19	1255	1228	1.32	44.6	17.1	10.28	66.9	1.92	13.1	5.4	7.36	14.17	1.64	7.38	38	130	317.073	0	0	0	29.7933	25.2333	29.5244	0
309	1	38	1	0	0	0	36	107	22	64.6667	1	1	85.95	3.59	2.86	0.796657	0.4	0.38	201	47.1	35.2	13.7	1.04	5.89	4.62	6726	1828	10.36	33.2	7.2	16.98	273.7	2.39	21.6	4.5	10.94	18.38	1.49	7.22	39	205	621.212	0	0	0	55.27	63.1233	38.0067	1
310	0	49	1	0	0	0	36.9	80	19	104.667	0	0	52.32	13.64	11.35	0.832111	0.31	1.95	216	49.6	33.2	13.5	1.02	3.96	0.87	454	519	0.06	51.4	11	3.68	35.5	2.3	8.29	1.88	8.68	13.9	3.88	7.42	33	98	296.97	0	0	0	40.4967	46.11	43.5444	0
311	0	41	1	0	0	0	36.8	81	19	140	0	0	15.37	19.8	17.9	0.90404	0.65	1.23	266	50.3	43.3	43.1	1.01	6.11	0.52	74	82	0.18	47.9	26.2	3.91	60.9	2.48	14.8	2.29	7.81	9.94	1.94	7.38	33	98	296.97	0	0	0	54.81	50.4233	42.6556	0
312	1	55	0	0	0	0	36.8	81	19	93	0	1	247.6	20.06	18.56	0.925224	0.7	0.78	128	46.4	35.4	12.9	0.96	4.44	1.1	1401.8	968	0.92	45.9	15.7	4.27	65.7	2.35	10.6	4.97	6.09	14.68	1.43	7.35	27	135	270	1	1	1	48.9212	64.37	45.059	1
313	0	30	1	0	0	0	36.6	119	29	115.333	0	1	285.4	11.67	9.49	0.813196	1.46	0.69	188	46.3	40	15.1	1.17	12.59	3.42	53.6	29	0.45	39.2	15	8.1	74	2.28	20.7	3.04	13.7	22.6	2.03	7.46	29	137	652.381	0	1	1	39.2464	51.64	49.058	0
314	0	40	1	0	0	0	37.2	120	20	109.333	0	1	9.05	18.6	16.31	0.876882	0.87	1.25	337	45.9	31	11.8	0.87	3.92	0.34	91.5	46	0.17	46.7	6.6	4.05	56.4	2.38	7.5	4.48	7.2	16.96	2.87	7.34	34	147	700	0	0	0	56.79	44.1533	34.1756	0
315	0	43	0	0	0	0	37.9	114	22	87.6667	0	1	184.49	16.4	15.02	0.915854	0.56	0.79	221	34.7	45.1	15.2	1.24	6.66	3.01	73.7	60	0.13	34.7	9.6	5.8	48	1.94	23.5	1.65	4.43	6.04	2.34	7.44	37	128	312.195	0	0	0	45.4034	55.37	32.6683	1
316	0	31	1	0	0	0	37.6	120	22	116.333	0	1	130.88	7.95	6.12	0.769811	0.25	1.37	214	42.5	50.7	12.5	0.95	7.37	0.58	48.3	36	0.33	46.5	8.6	4.86	77.5	2.48	15.39	3.08	11.92	21.08	2.94	7.37	34	124	590.476	0	0	0	55.16	44.4633	40.0711	0
317	0	37	1	0	0	0	36.7	120	27	113.333	0	1	184.04	18.34	13.25	0.722465	0.92	1.14	183	44.7	39.5	13.6	1.02	7.14	0.72	141	124	0.51	34.8	43.2	1.3	49	1.34	20.5	1.81	6.36	13.35	0.9	7.41	35	140	424.242	0	0	0	56	54.8633	40.9211	0
318	0	47	0	1	0	0	36.5	121	19	82.3333	0	0	18.38	7.49	5.92	0.790387	0.22	1.27	209	39.1	33.9	12.5	0.97	3.47	0.71	2422.9	726	0.01	44.2	17.4	4.9	17	2.03	16.88	2.95	10.69	39.83	1.01	7.46	29	99	471.429	0	0	0	51.4999	50.99	52.8596	0
319	0	36	1	1	0	0	37.2	121	19	94.3333	0	1	134.62	14.91	13.69	0.918176	0.6	0.61	230	46.8	31.4	12.3	0.91	5.22	0.4	180.9	278	0.89	42.4	21.8	3.4	71	2.05	17.27	2.76	7.99	18.4	0.86	7.41	34	97	461.905	0	1	1	54.08	43.1733	25.4556	1
320	0	36	0	0	1	0	37	109	21	77.6667	0	1	6.27	20.57	19.09	0.928051	0.72	0.72	309	42.7	34.5	12.8	0.96	4.15	0.82	1965	1835	0.67	38.9	14.7	6.23	63.1	1.95	8.7	3.03	6.68	18.07	2.36	7.38	39	128	441.379	0	1	0	56.91	52.66	31.0189	1
321	0	41	1	1	0	0	36.5	89	18	85.3333	0	0	0.5	9.96	4.03	0.404618	0.03	5.74	247	46.8	30.8	12.3	0.91	1.86	1.95	493.9	123	0.13	49.2	10.2	5	9	2.42	17.8	4.24	8.57	51.66	0.89	7.38	41	94	447.619	0	0	0	48.2416	54.82	31.6129	1
322	0	48	1	1	0	0	36.5	92	19	104.667	0	1	10.95	12.11	8.34	0.688687	0.42	3.01	271	40.4	33.5	13	0.97	3.2	3.12	689	400	0.01	53.4	25.8	3.8	3.5	2.69	22.22	2.04	21.37	5.74	3.51	7.32	30	92	278.788	0	0	0	24.1033	32.11	43.1189	0
323	0	30	1	0	0	0	37.4	123	21	115.667	0	1	46.47	13.92	12.68	0.91092	0.65	0.5	189	42.5	36.3	13.3	0.99	3.73	0.57	71	66	0.1	45.9	21.8	4.1	42	2.21	7.7	2.04	8.25	26.56	1.45	7.4	33	124	375.758	0	0	0	34.22	54.2467	48.4211	0
324	0	58	1	1	0	1	36.7	124	20	92.6667	0	0	21.37	5.36	3.25	0.606343	0.47	1.55	162	40.8	31.2	14.1	1.07	2.43	0.49	167.5	60	0.23	45.1	16.9	6.8	72	2.32	8	5.63	3.38	8.88	0.7	7.48	35	143	433.333	0	0	0	60.3402	52.93	55.5765	0
325	0	54	0	0	0	0	36.6	127	20	103.667	0	0	2.07	9.93	8.74	0.880161	0.26	0.83	192	43.7	29.8	12.1	1.25	3.27	0.79	1720.9	840	0.1	45.9	13.8	4.99	54.5	2.36	7.8	1.99	6.84	13.24	1.59	7.38	36	139	421.212	1	0	0	43.0839	53.19	44.8569	0
326	0	33	1	1	0	0	36.3	127	23	114.667	0	1	3.5	23.59	21.75	0.922001	0.02	1.72	272	50.9	31.9	12.9	0.95	2.78	0.79	1886	882	0.1	48.6	5.3	7.92	49.8	3.42	15.9	3.93	16.32	32.91	1.31	7.55	34	106	321.212	0	0	0	44.9611	54.17	50.9198	0
327	0	22	0	0	0	0	36.5	127	25	84.6667	0	1	37.01	19.11	15.78	0.825746	1.54	1.3	293	42.1	27.6	14.1	1.11	6.92	2.38	3503.8	896	0.07	51.7	23.6	4.3	73	2.2	29.07	2.5	8.02	14.09	1.55	7	26	114	345.455	0	0	0	25.1533	51.0233	41.6444	0
328	0	48	1	1	0	0	36.9	98	19	85.6667	0	1	147.45	12.56	11.61	0.924363	0.4	0.54	246	46.2	42.6	13.6	1.07	5.51	1	646.8	330	0.16	32.4	11.3	2	51	1.76	17.96	3.5	14.22	30.74	0.61	7.31	28	98	264.865	1	0	0	45.7833	53.8033	32.8211	1
329	0	48	1	0	0	0	36.7	130	24	120.667	0	1	24.16	18.14	16.96	0.93495	0.56	0.55	253	46	29.5	12	0.9	3.68	0.49	1027.7	464	0.1	42.3	8.7	3.7	62	2.17	7.9	2.3	10.17	28.11	1.59	7.35	27	123	372.727	0	0	0	51.74	58.5733	47.5044	0
330	0	28	1	1	0	0	37.5	130	19	118	0	1	44.79	12.22	10.71	0.876432	0.82	0.58	215	44.8	35.3	12.5	0.94	3.43	0.66	3140	1373	0.14	38.8	2.7	2.6	15	1.41	14.75	1.8	14.39	74.5	0.7	7.28	28	95	287.879	1	1	0	44.9167	50.9233	40.1267	0
331	0	39	1	0	1	0	36.5	76	18	107.667	0	0	37.11	21.51	16.04	0.7457	1.32	3.88	221	48.4	33.3	13.2	1.04	3.93	0.79	7368.1	1947	0.1	49.3	11	3.5	55	2.24	12.5	3.3	5.4	6.79	2.3	7.4	39	98	280	0	0	0	45.48	54.4667	44.3422	0
332	1	35	0	0	0	0	36.3	74	18	83	0	0	7.41	11.31	8.82	0.779841	0.32	2.04	256	33	33.3	12.1	0.89	3.02	0.71	610.5	639	0.01	41.2	13.2	2.7	19	2.28	8.9	2.37	27.57	84.7	5.72	7.43	49	79	239.394	1	1	1	75.4304	53.12	36.1216	1
333	0	49	1	0	0	0	36.5	134	20	105.333	0	0	1.2	15.21	14.11	0.927679	0.52	0.55	102	48.1	33.1	14.2	1.09	2.38	0.5	733.9	391	0.44	48.4	0.8	8.88	52.5	2.47	14.2	3.75	12.15	32.5	1.17	7.46	36	129	444.828	0	0	0	45.3927	54.69	49.9502	0
334	0	29	1	0	0	0	37.1	134	22	124.667	0	1	202.99	29.89	26.95	0.901639	1.53	1.31	319	49.4	36.4	13.5	1.01	6.98	1.67	3286.1	863	5.57	46.3	9.8	9.9	134	2.33	23.2	3.8	5.42	15.37	1.43	7.24	30	96	457.143	0	0	0	31.1633	55.47	42.4422	0
335	0	28	1	0	0	0	36.5	139	18	94	0	1	114.09	12.61	10.58	0.839017	1.03	0.99	235	48.8	37.1	12.9	1.01	5.29	0.43	618.9	217	2.15	46.9	15.8	5.24	63.1	1.13	17.7	1.5	13.61	30.55	4.55	7.4	38	96	234.146	0	1	1	52.6205	55.39	37.1113	1
336	1	57	1	1	0	0	36.6	135	25	81	0	1	228.66	12.58	10.55	0.838633	0.45	1.5	105	43.3	42	17.1	1.44	3.36	6.11	1225.5	677	70.51	30.2	14.8	9.97	166.9	0.98	22.9	13.1	4.77	9.47	0.61	7.02	20	225	548.78	1	0	0	57.6502	61.33	33.5271	1
337	1	47	1	0	0	0	36.5	138	22	83	0	1	12.16	12.31	12.01	0.97563	0.05	0.25	146	46.7	33.1	13.9	1.05	2.42	2.04	734	242.8	1.13	41.9	19.8	8.7	116	2.1	8.45	16.31	5.05	13.33	0.78	7.26	48	182	455	0	0	0	46.3367	57.2767	42.31	0
338	1	38	1	1	0	0	36.6	116	20	109.667	0	1	10.97	14.46	11.08	0.766252	0.77	2.32	267	48.6	32.2	12.2	0.89	2.87	0.49	277.8	81	0.17	43.8	3.8	3.61	39	2.32	18.6	3.85	7.74	23.17	2.8	7.43	36	153	373.171	0	0	0	24.03	48.4067	36.88	0
339	0	41	1	0	0	0	36.5	98	18	92.6667	0	0	2.3	14.14	11.63	0.822489	0.64	1.81	196	47.2	30.2	12.2	0.88	3.69	0.88	884.9	362	0.04	45.4	12.9	5.3	69	2.28	25.1	4.65	7.74	14.74	2.09	7.41	40	78	236.364	0	0	0	51.98	51.39	38.1999	0
340	0	57	1	0	0	0	36.5	136	21	112.667	0	1	125.02	12.12	10.57	0.872112	0.43	1.11	92	45.9	35	14.2	1.08	6.54	2.01	137.7	57	0.11	40.6	53	5	90	2.09	7.48	3.37	7.19	8.5	1.26	7.38	32	148	704.762	0	0	0	51.2233	56.3033	41.3889	0
341	0	54	1	0	0	0	36.5	83	20	98.6667	0	1	181.68	12.49	10.54	0.843875	0.43	1.42	99	39.9	28.8	13.5	1.07	3.18	0.54	662.9	478	0.01	44.7	13.9	6.7	56	2.15	12.2	1.45	8.07	27.43	0.95	7.38	27	107	324.242	0	0	0	63.8144	61.36	33.3389	1
342	1	70	0	0	1	0	37.2	68	20	116.667	0	0	25.37	12.45	10.97	0.881124	0.66	0.78	193	38.6	29.9	12.3	0.9	3.35	1.18	384.3	251	0.23	42.9	9.7	4.82	30.6	1.01	7.9	1.7	22.59	37.25	4.21	7.37	36	162	395.122	1	0	0	41.4708	49.37	26.1661	1
343	0	48	0	1	0	0	36.5	110	18	92.6667	0	0	9.5	11.56	10.66	0.922145	0.65	0.23	163	34.8	30.6	14.8	0.91	3.14	0.75	692.5	381	0.189	48.4	2.5	2.67	37.1	2.78	10.1	3.42	16	61.2	4.44	7.3	29	94	284.848	0	1	1	39.406	51.85	33.0112	1
344	0	52	0	0	0	0	36.7	110	16	94.6667	0	1	43.29	16.47	14.44	0.876746	0.64	1.33	220	43.9	28.2	13.6	1.02	3.18	1.39	147.4	164	0.01	40.3	12.7	4.5	41	2.11	10.4	6.01	7.15	10.77	1.62	7.35	28	104	253.659	0	0	0	53.5164	58.17	42.8519	0
345	1	58	1	1	0	0	36.7	111	24	90.6667	0	1	121.31	11.35	9.89	0.871366	0.48	0.96	189	50.7	36.4	13.9	1.06	5.32	1.25	1064.5	1159	0.21	36.5	20.3	6.4	62	1.74	16	2.88	7.56	17.36	2.03	7.29	33	100	344.828	0	1	1	56.38	33.2333	17.39	1
346	1	33	1	0	0	0	36.5	88	19	119.667	0	1	61.34	20.42	16.57	0.811459	1.85	1.93	366	43.5	33.1	12.1	0.93	3.94	3.77	702.4	296	0.15	39.4	16.2	3.5	108	2.16	21.27	2.1	25.12	79.73	0.7	7.18	28	241	401.667	0	1	0	39.5967	48.33	22.9678	1
[truncated: 3 more columns]
